# Supplementary material for: The design of C2-chiral bases with dual basic sites predicted to exceed the range of superbasicity: a computational study
Source: Royal Society of Chemistry journal article supplement (doi:10.1039/d2nj03537e), 2022-01-01
Supplement: d2nj03537e1.pdf [file d2nj03537e1.pdf]

## Design of C<sub>2</sub>-chiral bases with dual basic sites that predicted to exceed the range of superbasicity: A Computational Study

Anusuya Saha<sup>a,b</sup>, Bishwajit Ganguly<sup>a,b\*</sup>.

<sup>a</sup>Computation and Simulation Unit, Analytical and Environmental Science Division and Centralized Instrument Facility, CSIR-Central Salt & Marine Chemicals Research Institute, Bhavnagar, Gujarat-364002, India.

<sup>b</sup>Academy of Scientific and Innovative Research (AcSIR), Ghaziabad, India.

\*Corresponding Author. Bishwajit Ganguly, Computation and Simulation Unit, Analytical and Environmental Science Division and Centralized Instrument Facility, CSIR-Central Salt & Marine Chemicals Research Institute, Bhavnagar 364002, Gujarat, India.

Email: gang\_12@rediffmail.com; ganguly@csmcri.res.in

Fax: (+91)-278-2567562,

**Table S1.** Proton affinity calculated for Cyclopropeneimine and Tetramethylcyclopropeneimine scaffold at B3LYP/6-311+G(d,p) and CBS-QB3 reported values in (kcal/mol)

| System                       | PA calculated at B3LYP/6-311+G(d,p) (kcal/mol) | PA reported at CBS-QB3(in kcal/mol) |
|------------------------------|------------------------------------------------|-------------------------------------|
| Cyclopropeneimine            | 255.2                                          | 250.0                               |
| Tetramethylcyclopropeneimine | 260.9                                          | 255.9                               |

### Calculation for Average proton affinity:

$$PA_{\text{avg}}(\text{B}) = \frac{(E_{\text{el}})_{\text{ZPVE}}}{2}$$

$$(\Delta E_{\text{el}})_{\text{ZPVE}} = [E(\text{B})_{\text{ZPVE}} - E(\text{BH}_2^{2+})_{\text{ZPVE}}]$$

$\Delta E_{\text{el}}$  is the electronic energy and  $\Delta\text{ZPVE}$  is the zero-point vibrational energy contribution to the proton affinity. Here B denotes the base and  $\text{BH}_2^{2+}$  is the bisprotonated conjugate acid.

**Figure S1.** Mulliken charges of nitrogen atoms at the basic sites of **2** and the protonated **2H<sup>+</sup>** calculated at B3LYP/6-311+G(d,p) level of theory. The charges are in a.u. blue=nitrogen, black= carbon, yellow= hydrogen.

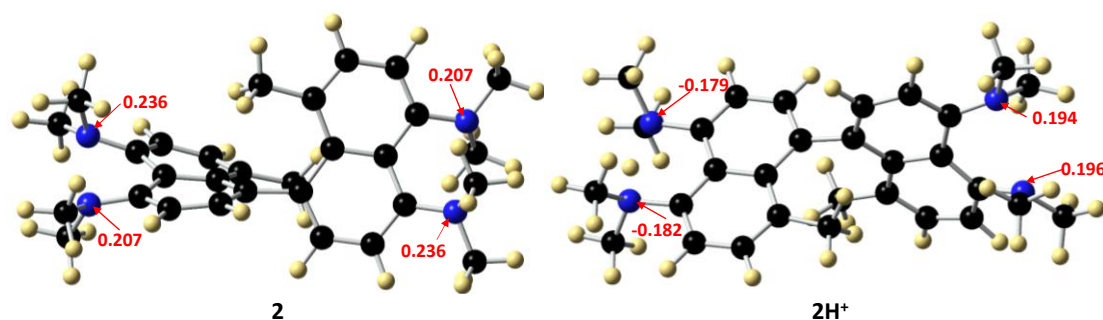

### Isodesmic reactions for strain energy calculation:

The strain energy of the unprotonated designed bases (**1-9**) may be estimated by isodesmic reaction such as

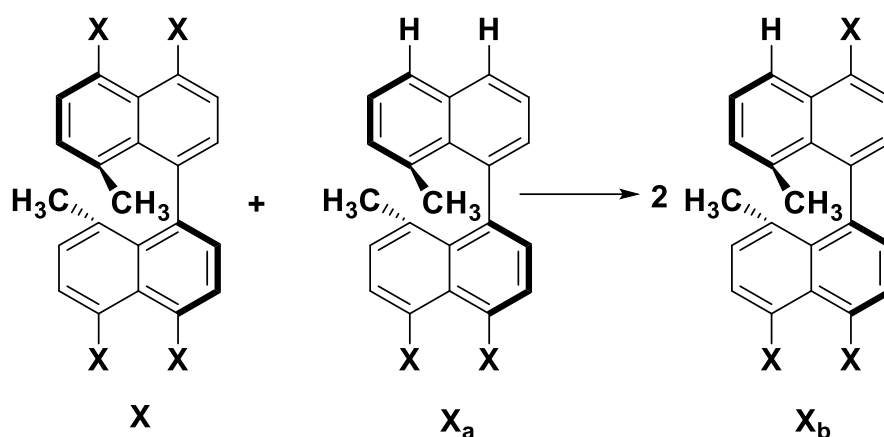

The strain energy (SE) is being calculated by the equation:

$$SE(X) = E(X) + (X_a) - 2E(X_b),$$

where X, X<sub>a</sub>, X<sub>b</sub> are the corresponding optimized geometries and X=1-9 of scheme 2 in the main text.

### Isodesmic reactions for hydrogen bonding and cationic strain energy calculations:

The intramolecular hydrogen bonding energy and the cationic strain can be calculated by isodesmic reaction:

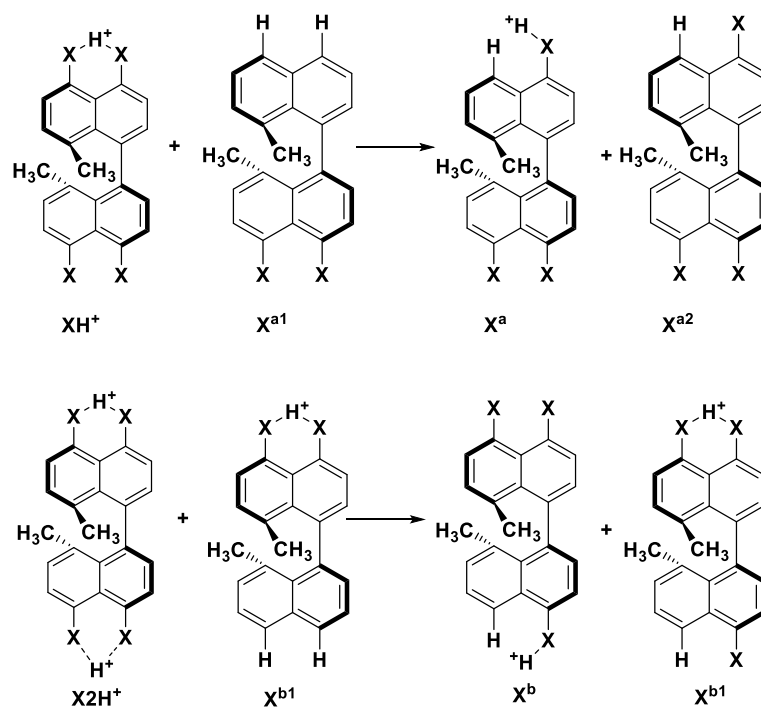

The cationic strain and hydrogen bonding energy can be calculated by equation:

for 1<sup>st</sup> protonation:  $\{[\text{HB}(\text{XH}^+) + \text{SE}(\text{XH}^+)] = \text{E}(\text{XH}^+) + \text{E}(\text{X}^{\text{a1}}) - \text{E}(\text{X}^{\text{a}}) - \text{E}(\text{X}^{\text{a2}})\}$  and

for 2<sup>nd</sup> protonation:  $\{[\text{HB}(\text{XH}^+) + \text{SE}(\text{XH}^+)] = \text{E}(\text{X2H}^+) + \text{E}(\text{X}^{\text{b1}}) - \text{E}(\text{X}^{\text{b}}) - \text{E}(\text{X}^{\text{b1}})\}$

Where  $\text{X}^{\text{a1}}$ ,  $\text{X}^{\text{a}}$ ,  $\text{X}^{\text{a2}}$ ,  $\text{X}^{\text{b1}}$ ,  $\text{X}^{\text{b}}$ ,  $\text{X}^{\text{b1}}$  are the corresponding optimized structure and  $\text{X}=\mathbf{1-9}$  of scheme 2 of main text.

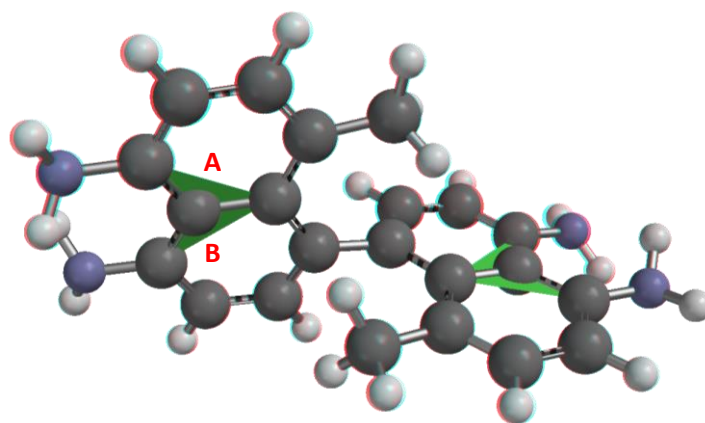

**Figure S2.** The nonplanarity of 8,8'-dimethyl-1,1'-binaphthalene with different substituents (**1-9**) is measured by the angle ( $\alpha$ ) between plane A (indicated by green) and plane B (indicated by green). Sky blue=nitrogen, grey=carbon, white = hydrogen

**Table S2.** The N...H<sup>+</sup>...N bond angle and angle x for measuring nonplanarity in unprotonated and bisprotonated bases for the optimized geometry of **1-9** at B3LYP/6-311+G(d,p)

| System   | N...H <sup>+</sup> ...N<br>bond angle<br>for 1 <sup>st</sup><br>protonation | N...H <sup>+</sup> ...N<br>bond angle<br>for 2 <sup>nd</sup><br>protonation | Angle x in<br>unpeotonated<br>Base | Angle x in<br>bispeotonated<br>Base |
|----------|-----------------------------------------------------------------------------|-----------------------------------------------------------------------------|------------------------------------|-------------------------------------|
| <b>1</b> | 152.7°                                                                      | 151.8°                                                                      | 0.29°                              | 0.06°                               |
| <b>2</b> | 158.4°                                                                      | 157.5°                                                                      | 0.24°                              | 0.04°                               |
| <b>3</b> | 144.1°                                                                      | 133.9°                                                                      | 0.20°                              | 1.67°                               |
| <b>4</b> | 143.4°                                                                      | 144.1°                                                                      | 0.12°                              | 1.12°                               |
| <b>5</b> | 141.5°                                                                      | 143.3°                                                                      | 0.04°                              | 0.14°                               |
| <b>6</b> | 144.9°                                                                      | 144.7°                                                                      | 1.18°                              | 0.04°                               |
| <b>7</b> | 141.5°                                                                      | 142.3°                                                                      | 1.41°                              | 0.62°                               |
| <b>8</b> | 140.2°                                                                      | 140.3°                                                                      | 1.14°                              | 1.31°                               |
| <b>9</b> | 140.7°                                                                      | 140.7°                                                                      | 0.99°                              | 1.30°                               |

**Table S3.**The kinetics of protonation calculated for 1,8-bis(dimethylamino)naphthalene (DMAN) and **2** at B3LYP/6-311+G(d,p) level.

| System          | G <sub>B</sub> (Hartree) | G <sub>HCl</sub> (Hartree) | G <sub>TS</sub> (Hartree) | ΔG (TS)<br>(kcal/mol) |
|-----------------|--------------------------|----------------------------|---------------------------|-----------------------|
| <b>DMAN:HCl</b> | -653.43250               | -460.83839                 | -1114.25592               | 9.4                   |
| <b>2:HCl</b>    | -1384.19869              | -460.83839                 | -1845.02369               | 8.4                   |

**Cartesian Coordinates:**

|                                     |             |             |             |             |             |             |             |
|-------------------------------------|-------------|-------------|-------------|-------------|-------------|-------------|-------------|
| <b>1</b>                            | C           | -1.48332700 | 1.43564000  | -1.01461900 |             |             |             |
|                                     | C           | -0.58594300 | 4.13089600  | -0.74551800 |             |             |             |
|                                     | H           | 2.06755900  | 2.72484200  | 2.79254400  |             |             |             |
| Electronic energy = -1070.89678 a.u | C           | -1.55006000 | 3.78645500  | -1.66710200 |             |             |             |
| C                                   | 1.06372700  | 1.12814700  | 1.75474000  | C           | -1.99854000 | 2.46642200  | -1.77238800 |
| C                                   | 0.15675900  | 0.73690200  | 0.78995700  | C           | -1.99854000 | 2.46642200  | -1.77238800 |
| C                                   | -0.47623600 | 1.73979400  | -0.02707300 | H           | -1.94661100 | 4.54469700  | -2.33538600 |
| C                                   | -0.07347300 | 3.12992000  | 0.15243000  | H           | -2.76305200 | 2.24045300  | -2.50825100 |
| C                                   | 0.82175700  | 3.47021400  | 1.22676100  | C           | -0.15675900 | -0.73690200 | 0.78995700  |
| C                                   | 1.38668000  | 2.46627000  | 1.98743600  | C           | 0.47623600  | -1.73979400 | -0.02707300 |

|   |             |             |             |                                     |             |             |             |
|---|-------------|-------------|-------------|-------------------------------------|-------------|-------------|-------------|
| C | -1.06372700 | -1.12814700 | 1.75474000  | H                                   | 2.80666700  | -0.13501100 | -2.07158100 |
| C | 1.48332700  | -1.43564000 | -1.01461900 | <b>1H<sup>+</sup></b>               |             |             |             |
| C | 0.07347300  | -3.12992000 | 0.15243000  | Electronic energy = -1071.27789 a.u |             |             |             |
| C | -1.38668000 | -2.46627000 | 1.98743600  | C                                   | 0.88796600  | 1.39259000  | -1.26016200 |
| C | 1.99854000  | -2.46642200 | -1.77238800 | C                                   | 0.67057700  | 0.28757100  | -0.45599600 |
| C | 0.58594300  | -4.13089600 | -0.74551800 | C                                   | 1.79508200  | -0.36275900 | 0.16800900  |
| C | -0.82175700 | -3.47021400 | 1.22676100  | C                                   | 3.13067400  | 0.09054000  | -0.18336200 |
| H | -2.06755900 | -2.72484200 | 2.79254400  | C                                   | 3.27640900  | 1.24495600  | -1.01054500 |
| C | 1.55006000  | -3.78645500 | -1.66710200 | C                                   | 2.17157900  | 1.88513000  | -1.51522600 |
| H | 2.76305200  | -2.24045300 | -2.50825100 | C                                   | 1.65675000  | -1.41077100 | 1.15149600  |
| H | 1.94661100  | -4.54469700 | -2.33538600 | C                                   | 4.23273700  | -0.64988500 | 0.33652400  |
| H | -1.52730400 | -0.36442700 | 2.36936800  | H                                   | 2.29768400  | 2.76113300  | -2.14336300 |
| H | 1.52730400  | 0.36442700  | 2.36936800  | C                                   | 4.07726600  | -1.69600600 | 1.20138000  |
| N | -1.16881300 | -4.80236100 | 1.52142800  | C                                   | 2.78951500  | -2.04455400 | 1.62897600  |
| H | -0.41890300 | -5.47259900 | 1.41274500  | H                                   | 4.93890100  | -2.23949600 | 1.57594100  |
| H | -1.62156400 | -4.89242100 | 2.42050100  | H                                   | 2.68327500  | -2.83043900 | 2.36652900  |
| N | 0.15675900  | -5.47661900 | -0.69392800 | C                                   | -0.71956700 | -0.25990200 | -0.45068300 |
| H | -0.84092100 | -5.59273700 | -0.56862800 | C                                   | -1.87490900 | 0.40371600  | 0.09298600  |
| H | 0.48044200  | -6.00510800 | -1.49300900 | C                                   | -0.88000800 | -1.40488800 | -1.21113500 |
| N | 1.16881300  | 4.80236100  | 1.52142800  | C                                   | -1.78654200 | 1.53571000  | 0.97535000  |
| H | 0.41890300  | 5.47259900  | 1.41274500  | C                                   | -3.18845600 | -0.13189600 | -0.23523200 |
| H | 1.62156400  | 4.89242100  | 2.42050100  | C                                   | -2.13439200 | -1.89780800 | -1.55806100 |
| N | -0.15675900 | 5.47661900  | -0.69392800 | C                                   | -2.95749100 | 2.11723600  | 1.42170000  |
| H | 0.84092100  | 5.59273700  | -0.56862800 | C                                   | -4.35542000 | 0.46570000  | 0.35437800  |
| H | -0.48044200 | 6.00510800  | -1.49300900 | C                                   | -3.28796800 | -1.24746200 | -1.14426600 |
| C | -2.03480600 | 0.05400200  | -1.30278300 | H                                   | -2.21310000 | -2.75559300 | -2.21709200 |
| H | -1.27395600 | -0.63449100 | -1.67481800 | C                                   | -4.21973900 | 1.60496100  | 1.12302900  |
| H | -2.48571100 | -0.41359300 | -0.42702400 | H                                   | -2.89596600 | 2.97897100  | 2.07771900  |
| H | -2.80666700 | 0.13501100  | -2.07158100 | H                                   | -5.10180600 | 2.06717300  | 1.55346200  |
| C | 2.03480600  | -0.05400200 | -1.30278300 | H                                   | -0.00132600 | -1.89685100 | -1.61510900 |
| H | 1.27395600  | 0.63449100  | -1.67481800 | H                                   | 0.03585400  | 1.86900000  | -1.72935200 |
| H | 2.48571100  | 0.41359300  | -0.42702400 | N                                   | -4.50879500 | -1.71913300 | -1.60976800 |

|                                     |             |             |             |   |             |             |             |
|-------------------------------------|-------------|-------------|-------------|---|-------------|-------------|-------------|
| H                                   | -5.25704900 | -1.04447700 | -1.69199100 | C | -1.94567500 | 2.88230000  | -1.60923100 |
| H                                   | -4.44262400 | -2.34657700 | -2.39777500 | H | -1.98784300 | 5.03799000  | -1.65585400 |
| N                                   | -5.64642000 | -0.05964400 | 0.15449100  | H | -2.74912200 | 2.80291400  | -2.33085600 |
| H                                   | -5.71794800 | -1.06410900 | 0.25931200  | C | -0.28121400 | -0.69935500 | 0.52548700  |
| H                                   | -6.34334500 | 0.40592000  | 0.72061800  | C | 0.31875800  | -1.83499300 | -0.12566000 |
| N                                   | 4.61710500  | 1.75518300  | -1.31135300 | C | -1.35712000 | -0.87829200 | 1.37097900  |
| H                                   | 4.73736800  | 1.89146300  | -2.31285400 | C | 1.38913400  | -1.73036900 | -1.08899000 |
| H                                   | 4.76314400  | 2.66329500  | -0.87366500 | C | -0.20558100 | -3.15325600 | 0.19622700  |
| N                                   | 5.60624700  | -0.28702200 | -0.09204400 | C | -1.90312000 | -2.14475100 | 1.61948200  |
| H                                   | 6.22549200  | -0.12832800 | 0.70417400  | C | 1.94567500  | -2.88230000 | -1.60923100 |
| H                                   | 6.02471600  | -1.01330400 | -0.67619700 | C | 0.45509900  | -4.28210800 | -0.37521300 |
| C                                   | 0.34493300  | -1.84231700 | 1.76755300  | C | -1.34439000 | -3.26258100 | 1.05739800  |
| H                                   | -0.30885000 | -0.99965000 | 1.98595800  | H | -2.76213000 | -2.24080100 | 2.27459500  |
| H                                   | -0.21480300 | -2.51539900 | 1.11590200  | C | 1.50450900  | -4.15975100 | -1.24062500 |
| H                                   | 0.54652500  | -2.36883800 | 2.70204800  | H | 2.74912200  | -2.80291400 | -2.33085600 |
| C                                   | -0.49827300 | 2.12427200  | 1.51515600  | H | 1.98784300  | -5.03799000 | -1.65585400 |
| H                                   | 0.21321900  | 1.36293600  | 1.83993300  | H | -1.78656000 | -0.01817000 | 1.87066100  |
| H                                   | 0.02112500  | 2.75964100  | 0.79252400  | H | 1.78656000  | 0.01817000  | 1.87066100  |
| H                                   | -0.72630900 | 2.74336800  | 2.38471300  | N | -1.91545500 | -4.57867800 | 1.33550400  |
| H                                   | 5.47452200  | 0.64965700  | -0.68193700 | H | -2.01701900 | -4.72904500 | 2.33747400  |
| <b>1H<sub>2</sub><sup>2+</sup></b>  |             |             |             | H | -2.84738800 | -4.66209200 | 0.93185900  |
| Electronic energy = -1071.58232 a.u |             |             |             | N | 0.01055400  | -5.64864300 | -0.00899700 |
| C                                   | 1.35712000  | 0.87829200  | 1.37097900  | H | -0.22624400 | -6.20786100 | -0.83130800 |
| C                                   | 0.28121400  | 0.69935500  | 0.52548700  | H | 0.72902400  | -6.15283200 | 0.51575100  |
| C                                   | -0.31875800 | 1.83499300  | -0.12566000 | N | 1.91545500  | 4.57867800  | 1.33550400  |
| C                                   | 0.20558100  | 3.15325600  | 0.19622700  | H | 2.01701900  | 4.72904500  | 2.33747400  |
| C                                   | 1.34439000  | 3.26258100  | 1.05739800  | H | 2.84738800  | 4.66209200  | 0.93185900  |
| C                                   | 1.90312000  | 2.14475100  | 1.61948200  | N | -0.01055400 | 5.64864300  | -0.00899700 |
| C                                   | -1.38913400 | 1.73036900  | -1.08899000 | H | 0.22624400  | 6.20786100  | -0.83130800 |
| C                                   | -0.45509900 | 4.28210800  | -0.37521300 | H | -0.72902400 | 6.15283200  | 0.51575100  |
| H                                   | 2.76213000  | 2.24080100  | 2.27459500  | C | -1.94567500 | 0.42729100  | -1.61755200 |
| C                                   | -1.50450900 | 4.15975100  | -1.24062500 | H | -1.16534600 | -0.27789900 | -1.90227000 |

|   |             |             |             |   |             |             |             |
|---|-------------|-------------|-------------|---|-------------|-------------|-------------|
| H | -2.58749600 | -0.07126400 | -0.88893600 | C | -0.34271000 | -3.57232500 | 1.24847900  |
| H | -2.54800200 | 0.62624400  | -2.50418700 | H | -1.38647100 | -3.03534400 | 3.04219700  |
| C | 1.94567500  | -0.42729100 | -1.61755200 | C | 1.51535800  | -3.38895100 | -2.02316200 |
| H | 1.16534600  | 0.27789900  | -1.90227000 | H | 2.74833700  | -1.75621300 | -2.65643100 |
| H | 2.58749600  | 0.07126400  | -0.88893600 | H | 1.80526500  | -3.99075600 | -2.87359800 |
| H | 2.54800200  | -0.62624400 | -2.50418700 | H | -1.28256400 | -0.62904900 | 2.64885600  |
| H | 0.88384700  | 5.49544100  | 0.62372200  | H | 1.28256400  | 0.62904900  | 2.64885600  |
| H | -0.88384700 | -5.49544100 | 0.62372200  | N | -0.38537900 | -4.95674900 | 1.51275600  |

**2**

Electronic energy = -1385.37355 a.u

|   |             |             |             |   |             |             |             |
|---|-------------|-------------|-------------|---|-------------|-------------|-------------|
| C | 0.79120500  | 1.29638000  | 1.94935400  | C | -2.15830400 | -0.20979500 | -1.04498200 |
| C | 0.04457900  | 0.75023000  | 0.92613700  | H | -1.45208300 | -0.95929600 | -1.40628900 |
| C | -0.60746700 | 1.63502900  | -0.00713000 | H | -2.51697900 | -0.54939800 | -0.07298500 |
| C | -0.29320900 | 3.05385000  | 0.05382200  | H | -3.00845800 | -0.20117600 | -1.73095300 |
| C | 0.34271000  | 3.57232500  | 1.24847900  | C | 2.15830400  | 0.20979500  | -1.04498200 |
| C | 0.89626600  | 2.67742900  | 2.14728100  | H | 1.45208300  | 0.95929600  | -1.40628900 |
| C | -1.56242600 | 1.18156500  | -0.98911500 | H | 2.51697900  | 0.54939800  | -0.07298500 |
| C | -0.63512000 | 3.88783800  | -1.08220900 | H | 3.00845800  | 0.20117600  | -1.73095300 |
| H | 1.38647100  | 3.03534400  | 3.04219700  | C | 1.32346600  | 5.43438800  | 2.51245600  |
| C | -1.51535800 | 3.38895100  | -2.02316200 | H | 2.31762000  | 5.02130600  | 2.33205700  |
| C | -2.01611900 | 2.08368800  | -1.92544800 | H | 1.38840500  | 6.52294100  | 2.43443800  |
| H | -1.80526500 | 3.99075600  | -2.87359800 | H | 1.02808500  | 5.19431300  | 3.54888100  |
| H | -2.74833700 | 1.75621300  | -2.65643100 | C | -0.89626600 | 5.65431400  | 1.59232400  |
| C | -0.04457900 | -0.75023000 | 0.92613700  | H | -0.75509700 | 6.71588200  | 1.37098700  |
| C | 0.60746700  | -1.63502900 | -0.00713000 | H | -1.60199300 | 5.24845800  | 0.87345200  |
| C | -0.79120500 | -1.29638000 | 1.94935400  | H | -1.33587700 | 5.56360000  | 2.59990800  |
| C | 1.56242600  | -1.18156500 | -0.98911500 | C | -0.71074700 | 6.08013800  | -2.18273900 |
| C | 0.29320900  | -3.05385000 | 0.05382200  | H | -1.78720700 | 6.12413300  | -2.00673000 |
| C | -0.89626600 | -2.67742900 | 2.14728100  | H | -0.30011700 | 7.08202400  | -2.03168900 |
| C | 2.01611900  | -2.08368800 | -1.92544800 | H | -0.54107400 | 5.80898300  | -3.23969400 |
| C | 0.63512000  | -3.88783800 | -1.08220900 | C | 1.37944200  | 5.25740500  | -1.30464500 |

|   |             |             |             |   |             |             |             |
|---|-------------|-------------|-------------|---|-------------|-------------|-------------|
| H | 1.70693200  | 6.26059100  | -1.01750000 | C | -2.23921300 | -2.26205400 | 1.73955600  |
| H | 1.83600200  | 4.54411200  | -0.62453100 | H | -4.32334900 | -2.75608400 | 1.90617900  |
| H | 1.74641500  | 5.04981700  | -2.32407400 | H | -1.94179200 | -3.12197900 | 2.32669400  |
| C | -1.37944200 | -5.25740500 | -1.30464500 | C | 0.77652600  | 0.67383500  | 0.15727000  |
| H | -1.74641500 | -5.04981700 | -2.32407400 | C | 1.76249600  | -0.01157200 | -0.63584400 |
| H | -1.70693200 | -6.26059100 | -1.01750000 | C | 1.18438100  | 1.48558000  | 1.19659100  |
| H | -1.83600200 | -4.54411200 | -0.62453100 | C | 1.43823300  | -0.80622100 | -1.79335400 |
| C | 0.71074700  | -6.08013800 | -2.18273900 | C | 3.15361300  | 0.09352700  | -0.22720200 |
| H | 1.78720700  | -6.12413300 | -2.00673000 | C | 2.53202400  | 1.74907200  | 1.45493800  |
| H | 0.30011700  | -7.08202400 | -2.03168900 | C | 2.45038200  | -1.51398800 | -2.40509900 |
| H | 0.54107400  | -5.80898300 | -3.23969400 | C | 4.11211500  | -0.84925000 | -0.77136600 |
| C | 0.89626600  | -5.65431400 | 1.59232400  | C | 3.53147200  | 1.13572100  | 0.71171300  |
| H | 0.75509700  | -6.71588200 | 1.37098700  | H | 2.77877000  | 2.50177800  | 2.18998000  |
| H | 1.60199300  | -5.24845800 | 0.87345200  | C | 3.74689500  | -1.58706500 | -1.88420900 |
| H | 1.33587700  | -5.56360000 | 2.59990800  | H | 2.22016600  | -2.09852700 | -3.28967800 |
| C | -1.32346600 | -5.43438800 | 2.51245600  | H | 4.44522000  | -2.27816400 | -2.33470800 |
| H | -1.02808500 | -5.19431300 | 3.54888100  | H | 0.43508300  | 1.99301000  | 1.79539700  |
| H | -2.31762000 | -5.02130600 | 2.33205700  | H | -0.45433300 | 2.48229900  | -1.16875700 |
| H | -1.38840500 | -6.52294100 | 2.43443800  | N | 4.86106600  | 1.52736100  | 0.87092500  |

## 2H<sup>+</sup>

Electronic energy = -1385.78697 a.u

|   |             |             |             |   |             |             |             |
|---|-------------|-------------|-------------|---|-------------|-------------|-------------|
| C | -1.17519100 | 1.77287100  | -0.78150700 | C | 0.16016800  | -1.79378000 | 1.58030100  |
| C | -0.70999800 | 0.67926600  | -0.07690900 | H | 0.74795000  | -1.99624400 | 0.68445700  |
| C | -1.65518800 | -0.26278000 | 0.46907700  | H | 0.67865500  | -1.00833500 | 2.12939100  |
| C | -3.07485500 | -0.03588700 | 0.22114300  | H | 0.15895400  | -2.69641200 | 2.19285500  |
| C | -3.47606700 | 1.11132900  | -0.53939300 | C | 0.06243200  | -0.91550100 | -2.41883700 |
| C | -2.53652200 | 1.98812800  | -1.01739400 | H | -0.67076300 | -1.39131000 | -1.76310400 |
| C | -1.26397300 | -1.41553100 | 1.24937400  | H | -0.34460400 | 0.05329600  | -2.71435000 |
| C | -4.00516200 | -0.97828400 | 0.76270400  | H | 0.13107700  | -1.52821300 | -3.31954700 |
| H | -2.84336200 | 2.86041900  | -1.58289400 | C | -5.23096800 | 1.33262200  | -2.24281400 |
| C | -3.60239100 | -2.05521800 | 1.50143200  | H | -4.87778500 | 0.39810300  | -2.67988800 |



|                                    |             |             |             |                                     |             |             |             |
|------------------------------------|-------------|-------------|-------------|-------------------------------------|-------------|-------------|-------------|
| H                                  | -6.31503600 | 1.39548500  | -2.35957900 | Electronic energy = -1386.13127 a.u |             |             |             |
| H                                  | -4.77559900 | 2.16425800  | -2.79087200 | C                                   | 1.21918300  | 1.04806800  | 1.21244600  |
| C                                  | -5.37755000 | 2.61720700  | -0.16759000 | C                                   | 0.18809400  | 0.73029300  | 0.35300000  |
| H                                  | -6.46141600 | 2.68347500  | -0.28483800 | C                                   | -0.53737900 | 1.77848300  | -0.31567900 |
| H                                  | -5.13242700 | 2.60900400  | 0.89498200  | C                                   | -0.18137900 | 3.15795700  | -0.00813400 |
| H                                  | -4.92558500 | 3.50636300  | -0.61963000 | C                                   | 0.91621700  | 3.41526300  | 0.88076700  |
| C                                  | -6.24608900 | -0.55867600 | 1.76163200  | C                                   | 1.59569200  | 2.37373200  | 1.45972700  |
| H                                  | -5.79177300 | 0.25987600  | 2.31678800  | C                                   | -1.57872700 | 1.52697700  | -1.28323100 |
| H                                  | -7.26887700 | -0.30019500 | 1.48567900  | C                                   | -0.95747700 | 4.19530400  | -0.61739700 |
| H                                  | -6.25198700 | -1.45540800 | 2.38010100  | H                                   | 2.42220000  | 2.57033900  | 2.13190300  |
| C                                  | -6.04986600 | -1.88040100 | -0.32455600 | C                                   | -1.97394600 | 3.92111600  | -1.48916200 |
| H                                  | -7.07498700 | -1.60859500 | -0.57841500 | C                                   | -2.26201400 | 2.59379700  | -1.82976900 |
| H                                  | -5.45731300 | -1.98748600 | -1.23129200 | H                                   | -2.55473400 | 4.71849500  | -1.93707100 |
| H                                  | -6.04706200 | -2.82232700 | 0.22272900  | H                                   | -3.04500200 | 2.40517400  | -2.55388600 |
| C                                  | 5.42260100  | -1.39681300 | 1.22670200  | C                                   | -0.18809400 | -0.73029300 | 0.35300000  |
| H                                  | 5.35042900  | -2.48940800 | 1.34845400  | C                                   | 0.53737900  | -1.77848300 | -0.31567900 |
| H                                  | 6.36460200  | -1.06243700 | 1.66892700  | C                                   | -1.21918300 | -1.04806800 | 1.21244600  |
| H                                  | 4.60636000  | -0.93705700 | 1.77662000  | C                                   | 1.57872700  | -1.52697700 | -1.28323100 |
| C                                  | 6.40410100  | -1.70309500 | -0.96191300 | C                                   | 0.18137900  | -3.15795700 | -0.00813400 |
| H                                  | 6.47120300  | -1.27646200 | -1.96400200 | C                                   | -1.59569200 | -2.37373200 | 1.45972700  |
| H                                  | 7.36586800  | -1.55495400 | -0.46544900 | C                                   | 2.26201400  | -2.59379700 | -1.82976900 |
| H                                  | 6.24114100  | -2.78983300 | -1.05213100 | C                                   | 0.95747700  | -4.19530400 | -0.61739700 |
| C                                  | 5.63149800  | 1.89963700  | -0.31655500 | C                                   | -0.91621700 | -3.41526300 | 0.88076700  |
| H                                  | 6.67830900  | 1.61112600  | -0.19441900 | H                                   | -2.42220000 | -2.57033900 | 2.13190300  |
| H                                  | 5.24186300  | 1.40939600  | -1.20350500 | C                                   | 1.97394600  | -3.92111600 | -1.48916200 |
| H                                  | 5.58439600  | 2.98754600  | -0.47631500 | H                                   | 3.04500200  | -2.40517400 | -2.55388600 |
| C                                  | 5.22393700  | 2.32087800  | 2.03401600  | H                                   | 2.55473400  | -4.71849500 | -1.93707100 |
| H                                  | 4.88495300  | 3.36772100  | 1.97148800  | H                                   | -1.74581600 | -0.25058300 | 1.72336100  |
| H                                  | 4.81929300  | 1.87592200  | 2.94461800  | H                                   | 1.74581600  | 0.25058300  | 1.72336100  |
| H                                  | 6.31270800  | 2.33110400  | 2.11865900  | N                                   | -1.32309200 | -4.78965000 | 1.16763700  |
| H                                  | -5.45619700 | 0.14369700  | -0.07927700 | N                                   | 0.67239300  | -5.61255700 | -0.28874700 |
| <b>2H<sub>2</sub><sup>2+</sup></b> |             |             |             | N                                   | 1.32309200  | 4.78965000  | 1.16763700  |

|   |             |             |             |                     |             |             |             |
|---|-------------|-------------|-------------|---------------------|-------------|-------------|-------------|
| N | -0.67239300 | 5.61255700  | -0.28874700 | H                   | 2.66497400  | -6.35691500 | -0.11922800 |
| C | -1.97394600 | 0.15709500  | -1.78918700 | C                   | -1.25514500 | -5.13119600 | 2.60930200  |
| H | -1.11525700 | -0.44084000 | -2.09424100 | H                   | -1.43133700 | -6.20187000 | 2.72708900  |
| H | -2.52119200 | -0.41718800 | -1.04003600 | H                   | -0.26664200 | -4.88801800 | 3.00010400  |
| H | -2.62213300 | 0.26863300  | -2.65878200 | H                   | -2.00555500 | -4.59395700 | 3.19845100  |
| C | 1.97394600  | -0.15709500 | -1.78918700 | C                   | -2.65603900 | -5.11404300 | 0.60214700  |
| H | 1.11525700  | 0.44084000  | -2.09424100 | H                   | -3.45711300 | -4.55340900 | 1.09564500  |
| H | 2.52119200  | 0.41718800  | -1.04003600 | H                   | -2.67325400 | -4.87861600 | -0.46266500 |
| H | 2.62213300  | -0.26863300 | -2.65878200 | H                   | -2.84891900 | -6.18026000 | 0.73446600  |
| C | 2.65603900  | 5.11404300  | 0.60214700  | H                   | -0.20616800 | -5.51176400 | 0.36772300  |
| H | 2.67325400  | 4.87861600  | -0.46266500 | H                   | 0.20616800  | 5.51176400  | 0.36772300  |
| H | 2.84891900  | 6.18026000  | 0.73446600  | <b>3</b>            |             |             |             |
| H | 3.45711300  | 4.55340900  | 1.09564500  | Electronic energy = | -1537.88235 | a.u         |             |
| C | 1.25514500  | 5.13119600  | 2.60930200  | C                   | 1.24521800  | -1.00259200 | 1.27039400  |
| H | 1.43133700  | 6.20187000  | 2.72708900  | C                   | 0.22282100  | -0.71922300 | 0.38815000  |
| H | 0.26664200  | 4.88801800  | 3.00010400  | C                   | -0.41326500 | -1.79449200 | -0.32686300 |
| H | 2.00555500  | 4.59395700  | 3.19845100  | C                   | 0.03601900  | -3.15622200 | -0.06724800 |
| C | -1.77214100 | 6.26067300  | 0.49723500  | C                   | 1.10639500  | -3.37981300 | 0.86492700  |
| H | -1.99489800 | 5.64503400  | 1.36683600  | C                   | 1.69744300  | -2.30490700 | 1.49969300  |
| H | -1.43869300 | 7.24867600  | 0.81475600  | C                   | -1.45786600 | -1.58236900 | -1.29955000 |
| H | -2.66497400 | 6.35691500  | -0.11922800 | C                   | -0.59756700 | -4.24973100 | -0.75187800 |
| C | -0.27874200 | 6.43613500  | -1.47697800 | H                   | 2.52129300  | -2.48441100 | 2.18066100  |
| H | 0.04424700  | 7.41688700  | -1.12802900 | C                   | -1.62399900 | -3.99383400 | -1.63664100 |
| H | 0.53703600  | 5.93843800  | -1.99790300 | C                   | -2.02773000 | -2.68188900 | -1.90675300 |
| H | -1.12586900 | 6.55233500  | -2.15123600 | H                   | -2.11893000 | -4.82677100 | -2.12251400 |
| C | 0.27874200  | -6.43613500 | -1.47697800 | H                   | -2.81827600 | -2.52506500 | -2.63335800 |
| H | 1.12586900  | -6.55233500 | -2.15123600 | C                   | -0.22282100 | 0.71922300  | 0.38815000  |
| H | -0.04424700 | -7.41688700 | -1.12802900 | C                   | 0.41326500  | 1.79449200  | -0.32686300 |
| H | -0.53703600 | -5.93843800 | -1.99790300 | C                   | -1.24521800 | 1.00259200  | 1.27039400  |
| C | 1.77214100  | -6.26067300 | 0.49723500  | C                   | 1.45786600  | 1.58236900  | -1.29955000 |
| H | 1.99489800  | -5.64503400 | 1.36683600  | C                   | -0.03601900 | 3.15622200  | -0.06724800 |
| H | 1.43869300  | -7.24867600 | 0.81475600  | C                   | -1.69744300 | 2.30490700  | 1.49969300  |

|   |             |             |             |                                     |             |             |             |
|---|-------------|-------------|-------------|-------------------------------------|-------------|-------------|-------------|
| C | 2.02773000  | 2.68188900  | -1.90675300 | H                                   | 0.01238800  | 8.03810200  | -0.03154100 |
| C | 0.59756700  | 4.24973100  | -0.75187800 | C                                   | -0.59756700 | 4.91301300  | 3.30832400  |
| C | -1.10639500 | 3.37981300  | 0.86492700  | H                                   | 0.12694500  | 5.71770000  | 3.47265300  |
| H | -2.52129300 | 2.48441100  | 2.18066100  | H                                   | -1.16519800 | 4.80232800  | 4.23813500  |
| C | 1.62399900  | 3.99383400  | -1.63664100 | H                                   | -0.05866700 | 3.98770700  | 3.11320400  |
| H | 2.81827600  | 2.52506500  | -2.63335800 | C                                   | -2.25790400 | 6.59663300  | 2.34275000  |
| H | 2.11893000  | 4.82677100  | -2.12251400 | H                                   | -2.85904000 | 6.57765400  | 3.25825200  |
| H | -1.70906000 | 0.18331900  | 1.80902800  | H                                   | -1.55249100 | 7.42868000  | 2.44387900  |
| H | 1.70906000  | -0.18331900 | 1.80902800  | H                                   | -2.90967900 | 6.77934500  | 1.48934900  |
| N | -1.66928300 | 4.65195600  | 1.08242000  | C                                   | 0.49993600  | -7.80042700 | -0.96295300 |
| N | 0.29435300  | 5.59814500  | -0.47565400 | H                                   | 0.10122100  | -8.43118200 | -1.76490400 |
| N | 1.66928300  | -4.65195600 | 1.08242000  | H                                   | 1.56270600  | -8.04715900 | -0.86464300 |
| N | -0.29435300 | -5.59814500 | -0.47565400 | H                                   | -0.01238800 | -8.03810200 | -0.03154100 |
| C | -1.97332200 | -0.22858200 | -1.74337100 | C                                   | 0.97703600  | -5.89048600 | -2.59013400 |
| H | -2.51554100 | 0.29802000  | -0.95652300 | H                                   | 0.55900800  | -6.43559600 | -3.44284400 |
| H | -1.17623400 | 0.43745100  | -2.07699700 | H                                   | 0.85709100  | -4.82256300 | -2.76262100 |
| H | -2.65764500 | -0.36855600 | -2.58319900 | H                                   | 2.04581500  | -6.12701300 | -2.55552100 |
| C | 1.97332200  | 0.22858200  | -1.74337100 | C                                   | 0.59756700  | -4.91301300 | 3.30832400  |
| H | 2.51554100  | -0.29802000 | -0.95652300 | H                                   | 1.16519800  | -4.80232800 | 4.23813500  |
| H | 1.17623400  | -0.43745100 | -2.07699700 | H                                   | 0.05866700  | -3.98770700 | 3.11320400  |
| H | 2.65764500  | 0.36855600  | -2.58319900 | H                                   | -0.12694500 | -5.71770000 | 3.47265300  |
| C | -1.51388200 | 5.29710300  | 2.16927500  | C                                   | 2.25790400  | -6.59663300 | 2.34275000  |
| C | -0.32887400 | 6.34128200  | -1.30109900 | H                                   | 2.85904000  | -6.57765400 | 3.25825200  |
| C | 1.51388200  | -5.29710300 | 2.16927500  | H                                   | 1.55249100  | -7.42868000 | 2.44387900  |
| C | 0.32887400  | -6.34128200 | -1.30109900 | H                                   | 2.90967900  | -6.77934500 | 1.48934900  |
| C | -0.97703600 | 5.89048600  | -2.59013400 | <b>3H<sup>+</sup></b>               |             |             |             |
| H | -2.04581500 | 6.12701300  | -2.55552100 | Electronic energy = -1538.29231 a.u |             |             |             |
| H | -0.55900800 | 6.43559600  | -3.44284400 | C                                   | -1.03939800 | 0.63345400  | 1.43577100  |
| H | -0.85709100 | 4.82256300  | -2.76262100 | C                                   | -0.71149100 | 0.04121900  | 0.22925200  |
| C | -0.49993600 | 7.80042700  | -0.96295300 | C                                   | -1.75441900 | -0.40174200 | -0.65853200 |
| H | -0.10122100 | 8.43118200  | -1.76490400 | C                                   | -3.13150300 | -0.10966600 | -0.29510900 |
| H | -1.56270600 | 8.04715900  | -0.86464300 | C                                   | -3.40815700 | 0.52877500  | 0.96422300  |

|   |             |             |             |   |             |             |             |
|---|-------------|-------------|-------------|---|-------------|-------------|-------------|
| C | -2.36226700 | 0.85890300  | 1.81293800  | H | -0.38992800 | -1.67494300 | 2.44832900  |
| C | -1.49243900 | -1.15749500 | -1.85318900 | H | -0.35297400 | -2.41528000 | 0.86377500  |
| C | -4.18876100 | -0.47939900 | -1.19543800 | H | 0.39663500  | -3.23891800 | 2.23202600  |
| H | -2.58733100 | 1.31196400  | 2.77069200  | C | 5.05098900  | 2.82283800  | -0.77258100 |
| C | -3.87452900 | -1.13171700 | -2.37436000 | C | 6.46580000  | -1.45571600 | 0.24888900  |
| C | -2.55665600 | -1.48448100 | -2.67106100 | C | -5.28566900 | 1.84661300  | 1.52633400  |
| H | -4.67174400 | -1.38065300 | -3.06431000 | C | -6.46126500 | -0.92268100 | -0.74595700 |
| H | -2.36632400 | -2.05388300 | -3.57499300 | C | 6.24394000  | -2.94426400 | 0.16928300  |
| C | 0.73329100  | 0.13431200  | -0.13031400 | H | 6.80940300  | -3.34567100 | -0.67554300 |
| C | 1.80041900  | -0.52935100 | 0.57804400  | H | 6.63319800  | -3.43913300 | 1.06539400  |
| C | 1.04046500  | 1.05402300  | -1.12211700 | H | 5.19357500  | -3.20966700 | 0.06305700  |
| C | 1.57055000  | -1.61502100 | 1.49828800  | C | 7.86504800  | -1.00102400 | -0.06280600 |
| C | 3.16698300  | -0.11737200 | 0.31170300  | H | 8.58245100  | -1.53821400 | 0.56568700  |
| C | 2.34080400  | 1.50840700  | -1.32659500 | H | 8.12256000  | -1.24068100 | -1.10012100 |
| C | 2.65650700  | -2.15972900 | 2.15758300  | H | 7.98792100  | 0.06781600  | 0.10667400  |
| C | 4.25173600  | -0.84777200 | 0.90619800  | C | 4.12619100  | 3.97439400  | -0.98884900 |
| C | 3.37585200  | 1.00507300  | -0.56264200 | H | 4.59386500  | 4.88778000  | -0.61790800 |
| H | 2.52155000  | 2.27523500  | -2.06591400 | H | 3.93678400  | 4.12612500  | -2.05751900 |
| C | 3.97398700  | -1.79182400 | 1.87274000  | H | 3.16474500  | 3.82441600  | -0.49665700 |
| H | 2.48636200  | -2.94763400 | 2.88224700  | C | 6.51763800  | 3.11241400  | -0.73377400 |
| H | 4.78842400  | -2.28008400 | 2.39251700  | H | 6.82456800  | 3.58408100  | -1.67337900 |
| H | 0.23126600  | 1.49880100  | -1.68796300 | H | 6.73188900  | 3.83349200  | 0.06144700  |
| H | -0.24436000 | 0.97164200  | 2.09238000  | H | 7.11903400  | 2.21787900  | -0.57811300 |
| N | 4.66884300  | 1.59177600  | -0.59195300 | C | -7.87414900 | -0.40392800 | -0.69512200 |
| N | 5.58369900  | -0.55807300 | 0.52234900  | H | -8.50633900 | -0.94980200 | -1.40328500 |
| N | -4.70618400 | 0.71513600  | 1.44386900  | H | -8.30550100 | -0.56331700 | 0.29865000  |
| N | -5.52136700 | -0.09647600 | -0.99150900 | H | -7.90236700 | 0.65761100  | -0.93656200 |
| C | -0.13370800 | -1.68763600 | -2.26447500 | C | -6.29247400 | -2.39371400 | -0.44821800 |
| H | 0.49623300  | -0.93371300 | -2.74492800 | H | -6.85157100 | -2.99761300 | -1.16999400 |
| H | 0.43455400  | -2.08953200 | -1.42378900 | H | -5.24981200 | -2.70606400 | -0.46079700 |
| H | -0.26979900 | -2.49995200 | -2.98091900 | H | -6.71638500 | -2.61014000 | 0.53773900  |
| C | 0.23088400  | -2.26366600 | 1.77100800  | C | -4.76116300 | 3.14477400  | 0.96147800  |

|                                     |             |             |             |   |             |             |             |
|-------------------------------------|-------------|-------------|-------------|---|-------------|-------------|-------------|
| H                                   | -4.75792900 | 3.92584400  | 1.72766800  | H | 2.79271500  | -2.11007800 | 2.23079900  |
| H                                   | -3.75864100 | 3.04486100  | 0.54876700  | C | -1.41090000 | -4.22043300 | -1.24549200 |
| H                                   | -5.43501500 | 3.48207700  | 0.16674200  | H | -2.75870100 | -2.92084900 | -2.27392300 |
| C                                   | -6.63574000 | 1.91615800  | 2.18833000  | H | -1.94765500 | -5.10338600 | -1.55825400 |
| H                                   | -6.61188800 | 2.61786400  | 3.02866600  | H | 1.75931400  | 0.05892100  | 1.77589200  |
| H                                   | -7.38663700 | 2.29197800  | 1.48562400  | H | -1.75931400 | -0.05892100 | 1.77589200  |
| H                                   | -6.93758400 | 0.93473900  | 2.55100500  | N | 2.04046000  | -4.46284300 | 1.31804200  |
| H                                   | 5.38838900  | 0.89519300  | -0.24124200 | N | 0.22584300  | -5.60662800 | -0.11148100 |
| <b>3H<sub>2</sub><sup>2+</sup></b>  |             |             |             | N | -2.04046000 | 4.46284300  | 1.31804200  |
| Electronic energy = -1538.63559 a.u |             |             |             | N | -0.22584300 | 5.60662800  | -0.11148100 |
| C                                   | -1.38686400 | 0.81710300  | 1.25757300  | C | 1.92098400  | 0.51431600  | -1.72880400 |
| C                                   | -0.31654100 | 0.68322200  | 0.39722900  | H | 2.57054500  | 0.01266500  | -1.00905100 |
| C                                   | 0.22584300  | 1.85149200  | -0.24343100 | H | 1.16058500  | -0.20424600 | -2.03278700 |
| C                                   | -0.35828800 | 3.14592200  | 0.06805700  | H | 2.52232200  | 0.75144700  | -2.60734300 |
| C                                   | -1.51168100 | 3.21084600  | 0.92968200  | C | -1.92098400 | -0.51431600 | -1.72880400 |
| C                                   | -1.98457500 | 2.05273500  | 1.51375100  | H | -2.57054500 | -0.01266500 | -1.00905100 |
| C                                   | 1.32859300  | 1.79005800  | -1.17329800 | H | -1.16058500 | 0.20424600  | -2.03278700 |
| C                                   | 0.27408300  | 4.31895800  | -0.47740600 | H | -2.52232200 | -0.75144700 | -2.60734300 |
| H                                   | -2.79271500 | 2.11007800  | 2.23079900  | C | 3.29762100  | -4.73110300 | 1.39738200  |
| C                                   | 1.41090000  | 4.22043300  | -1.24549200 | C | 0.21965100  | -6.74438800 | -0.74356300 |
| C                                   | 1.89946000  | 2.96552100  | -1.61561600 | C | -3.29762100 | 4.73110300  | 1.39738200  |
| H                                   | 1.94765500  | 5.10338600  | -1.55825400 | C | -0.21965100 | 6.74438800  | -0.74356300 |
| H                                   | 2.75870100  | 2.92084900  | -2.27392300 | C | -0.28600900 | -6.93871900 | -2.13313200 |
| C                                   | 0.31654100  | -0.68322200 | 0.39722900  | H | 0.28638400  | -7.73481900 | -2.61239300 |
| C                                   | -0.22584300 | -1.85149200 | -0.24343100 | H | -1.32964400 | -7.27351100 | -2.11625900 |
| C                                   | 1.38686400  | -0.81710300 | 1.25757300  | H | -0.22864400 | -6.02980000 | -2.73122800 |
| C                                   | -1.32859300 | -1.79005800 | -1.17329800 | C | 0.77435300  | -7.93814400 | -0.03794300 |
| C                                   | 0.35828800  | -3.14592200 | 0.06805700  | H | 0.01549600  | -8.72766100 | -0.01647100 |
| C                                   | 1.98457500  | -2.05273500 | 1.51375100  | H | 1.62127600  | -8.34220300 | -0.60154300 |
| C                                   | -1.89946000 | -2.96552100 | -1.61561600 | H | 1.08375000  | -7.72260500 | 0.98368700  |
| C                                   | -0.27408300 | -4.31895800 | -0.47740600 | C | 4.43281300  | -3.85325100 | 0.93842700  |
| C                                   | 1.51168100  | -3.21084600 | 0.92968200  | H | 5.17670700  | -4.46968700 | 0.42709600  |

|                                     |             |             |             |   |             |             |             |
|-------------------------------------|-------------|-------------|-------------|---|-------------|-------------|-------------|
| H                                   | 4.11105900  | -3.05110100 | 0.27674400  | C | 1.62401200  | 1.42166600  | -1.32559200 |
| H                                   | 4.94410300  | -3.40951600 | 1.79933200  | C | 1.11696000  | 4.16940100  | -0.70548200 |
| C                                   | 3.70298900  | -6.05734500 | 1.97592600  | H | -2.28301200 | 2.73354500  | 2.10169300  |
| H                                   | 4.20827700  | -6.66859500 | 1.22047500  | C | 2.10481300  | 3.79853400  | -1.59636300 |
| H                                   | 4.42967800  | -5.90558900 | 2.78043600  | C | 2.32984200  | 2.45275300  | -1.90891100 |
| H                                   | 2.84857600  | -6.59843300 | 2.37982700  | H | 2.71649900  | 4.57154300  | -2.04780100 |
| C                                   | -0.77435300 | 7.93814400  | -0.03794300 | H | 3.09426900  | 2.21322300  | -2.64117600 |
| H                                   | -0.01549600 | 8.72766100  | -0.01647100 | C | 0.14725900  | -0.73839100 | 0.34924300  |
| H                                   | -1.62127600 | 8.34220300  | -0.60154300 | C | -0.61023900 | -1.74349400 | -0.34991100 |
| H                                   | -1.08375000 | 7.72260500  | 0.98368700  | C | 1.14439100  | -1.12565800 | 1.22066500  |
| C                                   | 0.28600900  | 6.93871900  | -2.13313200 | C | -1.62401200 | -1.42166600 | -1.32559200 |
| H                                   | 1.32964400  | 7.27351100  | -2.11625900 | C | -0.32242500 | -3.14524500 | -0.07271100 |
| H                                   | 0.22864400  | 6.02980000  | -2.73122800 | C | 1.46358800  | -2.46883600 | 1.44299000  |
| H                                   | -0.28638400 | 7.73481900  | -2.61239300 | C | -2.32984200 | -2.45275300 | -1.90891100 |
| C                                   | -4.43281300 | 3.85325100  | 0.93842700  | C | -1.11696000 | -4.16940100 | -0.70548200 |
| H                                   | -5.17670700 | 4.46968700  | 0.42709600  | C | 0.75275700  | -3.48249100 | 0.82670600  |
| H                                   | -4.11105900 | 3.05110100  | 0.27674400  | H | 2.28301200  | -2.73354500 | 2.10169300  |
| H                                   | -4.94410300 | 3.40951600  | 1.79933200  | C | -2.10481300 | -3.79853400 | -1.59636300 |
| C                                   | -3.70298900 | 6.05734500  | 1.97592600  | H | -3.09426900 | -2.21322300 | -2.64117600 |
| H                                   | -4.20827700 | 6.66859500  | 1.22047500  | H | -2.71649900 | -4.57154300 | -2.04780100 |
| H                                   | -4.42967800 | 5.90558900  | 2.78043600  | H | 1.69985100  | -0.35864500 | 1.74984300  |
| H                                   | -2.84857600 | 6.59843300  | 2.37982700  | H | -1.69985100 | 0.35864500  | 1.74984300  |
| H                                   | 0.79807100  | -5.54529900 | 0.76298700  | N | 1.17754800  | -4.80591100 | 1.03172400  |
| H                                   | -0.79807100 | 5.54529900  | 0.76298700  | N | -0.99303800 | -5.53052700 | -0.37651200 |
| <b>4</b>                            |             |             |             | N | -1.17754800 | 4.80591100  | 1.03172400  |
| Electronic energy = -1666.35341 a.u |             |             |             | N | 0.99303800  | 5.53052700  | -0.37651200 |
| C                                   | -1.14439100 | 1.12565800  | 1.22066500  | C | 1.96277400  | 0.02330400  | -1.80197000 |
| C                                   | -0.14725900 | 0.73839100  | 0.34924300  | H | 2.45536700  | -0.57911900 | -1.03692400 |
| C                                   | 0.61023900  | 1.74349400  | -0.34991100 | H | 1.08444600  | -0.53653900 | -2.12595100 |
| C                                   | 0.32242500  | 3.14524500  | -0.07271100 | H | 2.64028300  | 0.09578400  | -2.65596300 |
| C                                   | -0.75275700 | 3.48249100  | 0.82670600  | C | -1.96277400 | -0.02330400 | -1.80197000 |
| C                                   | -1.46358800 | 2.46883600  | 1.44299000  | H | -2.45536700 | 0.57911900  | -1.03692400 |

|                                     |             |             |             |   |             |             |             |
|-------------------------------------|-------------|-------------|-------------|---|-------------|-------------|-------------|
| H                                   | -1.08444600 | 0.53653900  | -2.12595100 | C | 1.07976800  | 1.18664300  | -1.06256900 |
| H                                   | -2.64028300 | -0.09578400 | -2.65596300 | C | 0.75377600  | 0.25069300  | -0.09947700 |
| C                                   | 0.88103000  | -5.43797500 | 2.10128200  | C | 1.80508500  | -0.46337900 | 0.58179200  |
| C                                   | -0.42700900 | -6.35263400 | -1.17401300 | C | 3.18476500  | -0.09689200 | 0.30271300  |
| C                                   | -0.88103000 | 5.43797500  | 2.10128200  | C | 3.42752400  | 0.99484800  | -0.59282700 |
| C                                   | 0.42700900  | 6.35263400  | -1.17401300 | C | 2.40329300  | 1.56054000  | -1.31873500 |
| N                                   | -0.05288100 | 6.08287900  | -2.45026700 | C | 1.54961200  | -1.54574700 | 1.49999600  |
| H                                   | -0.05364100 | 5.10180500  | -2.69415800 | C | 4.26105700  | -0.84488100 | 0.90146100  |
| H                                   | -0.91586300 | 6.55293500  | -2.68636000 | H | 2.61362400  | 2.31152800  | -2.07125500 |
| N                                   | 0.21187100  | 7.67088400  | -0.77741100 | C | 3.95483700  | -1.80089200 | 1.84835300  |
| H                                   | 0.64663500  | 7.87396100  | 0.11253900  | C | 2.62567000  | -2.14030600 | 2.12833400  |
| H                                   | 0.40646400  | 8.36653000  | -1.48532400 | H | 4.75728200  | -2.31785300 | 2.36139600  |
| N                                   | -1.21210100 | 6.78534300  | 2.22816500  | H | 2.43809600  | -2.93223200 | 2.84476200  |
| H                                   | -1.78025200 | 7.10926400  | 1.45711900  | C | -0.70041000 | 0.18810300  | 0.26193700  |
| H                                   | -1.57826500 | 7.05086300  | 3.13281700  | C | -1.74371000 | -0.33478200 | -0.57786500 |
| N                                   | -0.21187100 | 4.93469100  | 3.21043300  | C | -1.02544400 | 0.85757000  | 1.42620600  |
| H                                   | 0.17692700  | 4.01108600  | 3.07754600  | C | -1.47634000 | -1.14439400 | -1.73988000 |
| H                                   | 0.43461200  | 5.57961600  | 3.64357800  | C | -3.12658000 | -0.06023100 | -0.20860800 |
| N                                   | 1.21210100  | -6.78534300 | 2.22816500  | C | -2.34835700 | 1.06206600  | 1.81736500  |
| H                                   | 1.78025200  | -7.10926400 | 1.45711900  | C | -2.54004200 | -1.54979600 | -2.51878400 |
| H                                   | 1.57826500  | -7.05086300 | 3.13281700  | C | -4.19139800 | -0.51458100 | -1.07391200 |
| N                                   | 0.21187100  | -4.93469100 | 3.21043300  | C | -3.40448900 | 0.64380400  | 1.02197900  |
| H                                   | -0.17692700 | -4.01108600 | 3.07754600  | H | -2.57330000 | 1.56768300  | 2.74870300  |
| H                                   | -0.43461200 | -5.57961600 | 3.64357800  | C | -3.86620700 | -1.22500500 | -2.21717400 |
| N                                   | -0.21187100 | -7.67088400 | -0.77741100 | H | -2.34414200 | -2.15381000 | -3.39900600 |
| H                                   | -0.64663500 | -7.87396100 | 0.11253900  | H | -4.66203900 | -1.53049900 | -2.88659300 |
| H                                   | -0.40646400 | -8.36653000 | -1.48532400 | H | -0.22800800 | 1.25291000  | 2.04761200  |
| N                                   | 0.05288100  | -6.08287900 | -2.45026700 | H | 0.27926900  | 1.68252700  | -1.59833100 |
| H                                   | 0.05364100  | -5.10180500 | -2.69415800 | N | -4.69245400 | 0.85055200  | 1.52256400  |
| H                                   | 0.91586300  | -6.55293500 | -2.68636000 | N | -5.52363000 | -0.17088200 | -0.84029700 |
| <b>4H<sup>+</sup></b>               |             |             |             | N | 4.76128600  | 1.49159200  | -0.72611800 |
| Electronic energy = -1666.77567 a.u |             |             |             | N | 5.60627200  | -0.57838400 | 0.54848700  |





|   |             |             |             |                                     |             |             |             |
|---|-------------|-------------|-------------|-------------------------------------|-------------|-------------|-------------|
| H | -3.13344600 | -2.21408900 | -2.57456700 | N                                   | 1.35351600  | -6.58210100 | 2.69094800  |
| H | -2.61928100 | -4.56737500 | -2.14987300 | H                                   | 1.91869300  | -6.97997100 | 1.95634100  |
| H | 1.68769400  | -0.37312600 | 1.80105100  | H                                   | 1.59041100  | -6.89595500 | 3.61997900  |
| H | -1.68769400 | 0.37312600  | 1.80105100  | N                                   | 0.69491300  | -4.56360500 | 3.62434700  |
| N | 0.90445800  | -4.83853100 | 1.27295800  | H                                   | 0.22695400  | -3.67608500 | 3.53030500  |
| N | -0.59693600 | -5.50869200 | -0.69442800 | H                                   | 0.62417400  | -5.02261300 | 4.51834900  |
| N | -0.90445800 | 4.83853100  | 1.27295800  | N                                   | -0.19495000 | -7.68444900 | -1.29733500 |
| N | 0.59693600  | 5.50869200  | -0.69442800 | H                                   | -0.31197900 | -7.97425200 | -0.33952900 |
| C | 2.00489100  | 0.02505800  | -1.73080600 | H                                   | 0.04131000  | -8.38891500 | -1.97755700 |
| H | 2.48277400  | -0.54999600 | -0.93671400 | N                                   | -0.63268300 | -6.13886400 | -2.96056200 |
| H | 1.14183900  | -0.54932400 | -2.06941600 | H                                   | -0.70515000 | -5.17979500 | -3.26418100 |
| H | 2.70655600  | 0.08642700  | -2.56382800 | H                                   | -0.67699100 | -6.86520100 | -3.65726400 |
| C | -2.00489100 | -0.02505800 | -1.73080600 | H                                   | -0.01818600 | 5.63244500  | 0.15608500  |
| H | -2.48277400 | 0.54999600  | -0.93671400 | H                                   | 0.01818600  | -5.63244500 | 0.15608500  |
| H | -1.14183900 | 0.54932400  | -2.06941600 | <b>5</b>                            |             |             |             |
| H | -2.70655600 | -0.08642700 | -2.56382800 | Electronic energy = -2295.34408 a.u |             |             |             |
| C | 0.98673900  | -5.27343700 | 2.50273000  | C                                   | -1.03570400 | 1.17833800  | 1.21922200  |
| C | -0.48802500 | -6.42042100 | -1.65951700 | C                                   | -0.11536800 | 0.74494100  | 0.28505800  |
| C | -0.98673900 | 5.27343700  | 2.50273000  | C                                   | 0.62177600  | 1.71889800  | -0.47703600 |
| C | 0.48802500  | 6.42042100  | -1.65951700 | C                                   | 0.34802700  | 3.13030700  | -0.24240300 |
| N | 0.63268300  | 6.13886400  | -2.96056200 | C                                   | -0.56868300 | 3.51740900  | 0.79812200  |
| H | 0.70515000  | 5.17979500  | -3.26418100 | C                                   | -1.26063200 | 2.53170400  | 1.48322300  |
| H | 0.67699100  | 6.86520100  | -3.65726400 | C                                   | 1.60640500  | 1.36135200  | -1.46950700 |
| N | 0.19495000  | 7.68444900  | -1.29733500 | C                                   | 0.99736800  | 4.12836300  | -1.05281200 |
| H | 0.31197900  | 7.97425200  | -0.33952900 | H                                   | -1.93200300 | 2.82058700  | 2.28435000  |
| H | -0.04131000 | 8.38891500  | -1.97755700 | C                                   | 1.94950200  | 3.72606800  | -1.97210600 |
| N | -1.35351600 | 6.58210100  | 2.69094800  | C                                   | 2.24705000  | 2.37184400  | -2.15689600 |
| H | -1.91869300 | 6.97997100  | 1.95634100  | H                                   | 2.42309200  | 4.47314300  | -2.59951300 |
| H | -1.59041100 | 6.89595500  | 3.61997900  | H                                   | 2.98835400  | 2.10423400  | -2.90358300 |
| N | -0.69491300 | 4.56360500  | 3.62434700  | C                                   | 0.11536800  | -0.74494100 | 0.28505800  |
| H | -0.22695400 | 3.67608500  | 3.53030500  | C                                   | -0.62177600 | -1.71889800 | -0.47703600 |
| H | -0.62417400 | 5.02261300  | 4.51834900  | C                                   | 1.03570400  | -1.17833800 | 1.21922200  |

|   |             |             |             |   |             |             |             |
|---|-------------|-------------|-------------|---|-------------|-------------|-------------|
| C | -1.60640500 | -1.36135200 | -1.46950700 | N | 2.94097100  | -5.25892000 | 0.67907100  |
| C | -0.34802700 | -3.13030700 | -0.24240300 | N | -1.03570400 | -7.69570800 | -1.47367900 |
| C | 1.26063200  | -2.53170400 | 1.48322300  | N | -2.59729300 | -6.46122900 | -0.24044300 |
| C | -2.24705000 | -2.37184400 | -2.15689600 | C | 2.84579400  | 5.49769400  | 0.82268100  |
| C | -0.99736800 | -4.12836300 | -1.05281200 | H | 1.90103600  | 5.20328700  | 1.27700500  |
| C | 0.56868300  | -3.51740900 | 0.79812200  | H | 3.36625100  | 4.60027900  | 0.46511700  |
| H | 1.93200300  | -2.82058700 | 2.28435000  | H | 3.46812500  | 5.97687700  | 1.58697500  |
| C | -1.94950200 | -3.72606800 | -1.97210600 | C | 3.79097500  | 7.05445900  | -0.82732400 |
| H | -2.98835400 | -2.10423400 | -2.90358300 | H | 3.52021200  | 7.68883300  | -1.66921300 |
| H | 1.57655000  | -0.43497000 | 1.79553700  | H | 4.32950500  | 7.66047300  | -0.08880400 |
| H | -1.57655000 | 0.43497000  | 1.79553700  | H | 4.47604500  | 6.27284700  | -1.18627500 |
| N | 0.65478800  | -4.83619500 | 1.25661000  | C | -0.07251900 | 7.72781000  | -2.41639900 |
| N | -0.57732800 | -5.46414100 | -1.06120100 | H | -1.04890500 | 7.72386300  | -1.91216200 |
| N | -0.65478800 | 4.83619500  | 1.25661000  | H | 0.00437400  | 8.63792600  | -3.01875800 |
| N | 0.57732800  | 5.46414100  | -1.06120100 | H | -0.02835000 | 6.85821100  | -3.06901500 |
| C | 1.98674500  | -0.05545900 | -1.84868600 | C | 1.16641900  | 8.91224000  | -0.67837400 |
| H | 2.43463100  | -0.60891900 | -1.02177200 | H | 1.44319800  | 9.75529300  | -1.31934100 |
| H | 1.13538800  | -0.64342900 | -2.19585000 | H | 0.21915300  | 9.16290200  | -0.17805600 |
| H | 2.71559900  | -0.02084000 | -2.66212600 | H | 1.93132500  | 8.78493300  | 0.08394400  |
| C | -1.98674500 | 0.05545900  | -1.84868600 | C | -2.46274000 | 7.76673900  | 1.99713700  |
| H | -2.43463100 | 0.60891900  | -1.02177200 | H | -3.00413600 | 8.17904100  | 2.85466900  |
| H | -1.13538800 | 0.64342900  | -2.19585000 | H | -1.69883300 | 8.49826300  | 1.69487500  |
| H | -2.71559900 | 0.02084000  | -2.66212600 | H | -3.15867200 | 7.63934400  | 1.17134100  |
| C | 1.76936500  | -5.46410700 | 1.40482000  | C | -0.78599300 | 6.59527700  | 3.33144400  |
| C | -1.38314700 | -6.45878000 | -0.92618400 | H | -0.47262700 | 5.60205400  | 3.64624400  |
| C | -1.76936500 | 5.46410700  | 1.40482000  | H | 0.09453800  | 7.11921800  | 2.93436800  |
| C | 1.38314700  | 6.45878000  | -0.92618400 | H | -1.15868000 | 7.14983600  | 4.19796200  |
| N | 2.59729300  | 6.46122900  | -0.24044300 | C | -2.88981300 | 4.68206600  | -0.65681900 |
| N | 1.03570400  | 7.69570800  | -1.47367900 | H | -1.92808300 | 4.90709500  | -1.11539000 |
| N | -1.85437200 | 6.48806400  | 2.34930600  | H | -3.03897300 | 3.59504200  | -0.65193200 |
| N | -2.94097100 | 5.25892000  | 0.67907100  | H | -3.68216800 | 5.13651700  | -1.26227900 |
| N | 1.85437200  | -6.48806400 | 2.34930600  | C | -4.23498700 | 5.17249300  | 1.34141000  |

|   |             |             |             |                                     |             |             |             |
|---|-------------|-------------|-------------|-------------------------------------|-------------|-------------|-------------|
| H | -4.98748600 | 5.76791400  | 0.81030500  | H                                   | -3.52021200 | -7.68883300 | -1.66921300 |
| H | -4.58665800 | 4.13120200  | 1.36820300  | H                                   | -4.32950500 | -7.66047300 | -0.08880400 |
| H | -4.15908200 | 5.53696700  | 2.36407500  | H                                   | -4.47604500 | -6.27284700 | -1.18627500 |
| C | 0.78599300  | -6.59527700 | 3.33144400  | H                                   | -2.42309200 | -4.47314300 | -2.59951300 |
| H | 0.47262700  | -5.60205400 | 3.64624400  | <b>5H<sup>+</sup></b>               |             |             |             |
| H | -0.09453800 | -7.11921800 | 2.93436800  | Electronic energy = -2295.78624 a.u |             |             |             |
| H | 1.15868000  | -7.14983600 | 4.19796200  | C                                   | -0.95769100 | -1.18801500 | 0.60390300  |
| C | 2.46274000  | -7.76673900 | 1.99713700  | C                                   | -0.64875800 | -0.03652100 | -0.09771600 |
| H | 3.00413600  | -8.17904100 | 2.85466900  | C                                   | -1.71125100 | 0.79383800  | -0.60106700 |
| H | 1.69883300  | -8.49826300 | 1.69487500  | C                                   | -3.08110200 | 0.41463000  | -0.29121100 |
| H | 3.15867200  | -7.63934400 | 1.17134100  | C                                   | -3.33635600 | -0.72836400 | 0.55096000  |
| C | 0.07251900  | -7.72781000 | -2.41639900 | C                                   | -2.26855900 | -1.53577400 | 0.92774200  |
| H | 1.04890500  | -7.72386300 | -1.91216200 | C                                   | -1.48132400 | 1.94832600  | -1.42936000 |
| H | -0.00437400 | -8.63792600 | -3.01875800 | C                                   | -4.17545200 | 1.17623100  | -0.83784000 |
| H | 0.02835000  | -6.85821100 | -3.06901500 | H                                   | -2.45675100 | -2.39243500 | 1.56470100  |
| C | -1.16641900 | -8.91224000 | -0.67837400 | C                                   | -3.88932400 | 2.32197700  | -1.56638100 |
| H | -1.44319800 | -9.75529300 | -1.31934100 | C                                   | -2.57176800 | 2.68552100  | -1.84984600 |
| H | -0.21915300 | -9.16290200 | -0.17805600 | H                                   | -4.70763500 | 2.88869900  | -1.99551900 |
| H | -1.93132500 | -8.78493300 | 0.08394400  | H                                   | -2.40185400 | 3.55767500  | -2.47395600 |
| C | 4.23498700  | -5.17249300 | 1.34141000  | C                                   | 0.80618200  | 0.31833500  | -0.08786900 |
| H | 4.98748600  | -5.76791400 | 0.81030500  | C                                   | 1.82542500  | -0.43212700 | -0.78033700 |
| H | 4.58665800  | -4.13120200 | 1.36820300  | C                                   | 1.18036600  | 1.31491500  | 0.79415400  |
| H | 4.15908200  | -5.53696700 | 2.36407500  | C                                   | 1.53098100  | -1.38071100 | -1.82502000 |
| C | 2.88981300  | -4.68206600 | -0.65681900 | C                                   | 3.21338600  | -0.20102100 | -0.42634200 |
| H | 1.92808300  | -4.90709500 | -1.11539000 | C                                   | 2.52027000  | 1.64637700  | 1.01865900  |
| H | 3.03897300  | -3.59504200 | -0.65193200 | C                                   | 2.57419300  | -2.11401400 | -2.35517100 |
| H | 3.68216800  | -5.13651700 | -1.26227900 | C                                   | 4.23321400  | -1.09922300 | -0.90982900 |
| C | -2.84579400 | -5.49769400 | 0.82268100  | C                                   | 3.52065400  | 0.92186300  | 0.40896100  |
| H | -1.90103600 | -5.20328700 | 1.27700500  | H                                   | 2.76914600  | 2.45182700  | 1.70047200  |
| H | -3.36625100 | -4.60027900 | 0.46511700  | C                                   | 3.89018700  | -2.01363600 | -1.88701700 |
| H | -3.46812500 | -5.97687700 | 1.58697500  | H                                   | 2.36658100  | -2.80500800 | -3.16508000 |
| C | -3.79097500 | -7.05445900 | -0.82732400 | H                                   | 0.40715100  | 1.84355700  | 1.33895400  |

|   |             |             |             |   |             |             |             |
|---|-------------|-------------|-------------|---|-------------|-------------|-------------|
| H | -0.14714300 | -1.80626700 | 0.97710000  | H | -6.52041400 | 4.51653500  | 0.01566100  |
| N | 4.88518200  | 1.27403800  | 0.61130400  | C | -7.82177900 | 0.23851500  | -2.14170300 |
| N | 5.55399300  | -1.00229500 | -0.42874100 | H | -7.77181700 | -0.82359100 | -1.86602700 |
| N | -4.58031600 | -0.94391300 | 1.12653300  | H | -8.76706000 | 0.41797300  | -2.66144200 |
| N | -5.48249000 | 0.69906200  | -0.81139100 | H | -6.99521200 | 0.45324700  | -2.81563900 |
| C | -0.12692600 | 2.40279400  | -1.93545300 | C | -8.92649000 | 1.03998800  | -0.11228000 |
| H | 0.46963900  | 2.90157800  | -1.16574300 | H | -9.80172600 | 1.45860600  | -0.61822000 |
| H | 0.48013700  | 1.58248400  | -2.32290400 | H | -9.15285900 | -0.00283000 | 0.15122500  |
| H | -0.27187200 | 3.11404600  | -2.75163900 | H | -8.75378800 | 1.59465900  | 0.80658800  |
| C | 0.16625900  | -1.58927400 | -2.44630700 | C | -7.38037400 | -2.94051900 | 1.91463200  |
| H | -0.49345300 | -2.18928600 | -1.81701400 | H | -7.64150600 | -3.67951400 | 2.67809000  |
| H | -0.35545300 | -0.65250700 | -2.64145100 | H | -8.14972300 | -2.15601500 | 1.92294700  |
| H | 0.28714700  | -2.10985200 | -3.39886100 | H | -7.39571900 | -3.42254400 | 0.94035000  |
| C | 5.39914300  | 2.49590300  | 0.79933700  | C | -6.01240600 | -1.53138000 | 3.37182000  |
| C | 6.29411700  | -2.06361500 | -0.19867700 | H | -4.98129300 | -1.26570000 | 3.59530700  |
| C | -5.18684200 | -2.08541200 | 1.14434300  | H | -6.58553500 | -0.60307400 | 3.24576100  |
| C | -6.50118300 | 1.40979500  | -0.45572300 | H | -6.43284100 | -2.08755400 | 4.21426900  |
| N | -6.48793300 | 2.45630600  | 0.45927100  | C | -4.69713800 | -2.74774800 | -1.18818300 |
| N | -7.75320200 | 1.11196500  | -0.97896700 | H | -4.94421200 | -1.70841900 | -1.39947400 |
| N | -6.06139000 | -2.37272200 | 2.18413000  | H | -3.62629400 | -2.90815800 | -1.36799600 |
| N | -5.08421400 | -3.07603900 | 0.17656300  | H | -5.26051300 | -3.38830600 | -1.87519800 |
| N | 6.54111000  | 2.59696300  | 1.52667700  | C | -4.99351100 | -4.48740300 | 0.52752700  |
| N | 4.85074900  | 3.61725300  | 0.27443900  | H | -5.72318100 | -5.08386700 | -0.03260000 |
| N | 7.65829200  | -1.95002600 | -0.32116000 | H | -3.99208800 | -4.87253000 | 0.29153500  |
| N | 5.82998400  | -3.29374000 | 0.21214500  | H | -5.17345100 | -4.62387600 | 1.59179900  |
| C | -5.46155900 | 2.53015500  | 1.48880000  | C | 6.90963200  | 1.58492100  | 2.51820700  |
| H | -5.07614800 | 1.53245900  | 1.69342200  | H | 6.02545000  | 1.03821300  | 2.83852700  |
| H | -4.62894200 | 3.18629400  | 1.20440300  | H | 7.64186500  | 0.87676600  | 2.11637100  |
| H | -5.91336600 | 2.92593100  | 2.40502900  | H | 7.35247400  | 2.08445400  | 3.38313000  |
| C | -7.21942500 | 3.69389700  | 0.21976900  | C | 7.57296700  | 3.59431600  | 1.23298000  |
| H | -7.87902500 | 3.58247800  | -0.63835300 | H | 7.67575000  | 4.31667400  | 2.04770600  |
| H | -7.82146300 | 3.97266200  | 1.09261300  | H | 8.53184000  | 3.08509100  | 1.10250500  |



|   |             |             |             |   |             |             |             |
|---|-------------|-------------|-------------|---|-------------|-------------|-------------|
| H | 2.57749600  | -0.39771900 | -2.99016300 | H | 4.72570300  | 7.56633400  | 0.95258600  |
| C | -1.92906200 | 0.35317600  | -2.11328200 | C | -1.83168700 | 8.05433600  | 1.40869600  |
| H | -2.31594600 | 1.06265400  | -1.37866000 | H | -2.47872200 | 8.28038500  | 2.26023000  |
| H | -0.94533000 | 0.71237700  | -2.41672300 | H | -1.14397100 | 8.89197900  | 1.26846200  |
| H | -2.57749600 | 0.39771900  | -2.99016300 | H | -2.43761400 | 7.95288200  | 0.51167800  |
| C | 1.23185100  | -5.70432300 | 0.91662100  | C | 0.07532400  | 6.97940300  | 2.56816600  |
| C | -3.31939500 | -5.80062600 | -0.32255700 | H | 0.44493700  | 5.99997600  | 2.86270800  |
| C | -1.23185100 | 5.70432300  | 0.91662100  | H | 0.89306600  | 7.55278500  | 2.12065300  |
| C | 3.31939500  | 5.80062600  | -0.32255700 | H | -0.27284200 | 7.51067300  | 3.45655300  |
| N | 4.48866700  | 5.22554900  | 0.11199600  | C | -2.66870100 | 4.67060500  | -0.79621500 |
| N | 3.36334300  | 7.13973100  | -0.59498300 | H | -1.75540400 | 4.67422400  | -1.38639700 |
| N | -1.04779300 | 6.83519200  | 1.63664700  | H | -2.96785500 | 3.63533800  | -0.61100000 |
| N | -2.46747500 | 5.39989900  | 0.45704100  | H | -3.45683000 | 5.17144000  | -1.36357900 |
| N | 1.04779300  | -6.83519200 | 1.63664700  | C | -3.68469000 | 5.66348600  | 1.23092800  |
| N | 2.46747500  | -5.39989900 | 0.45704100  | H | -4.31920100 | 6.40702900  | 0.74145400  |
| N | -3.36334300 | -7.13973100 | -0.59498300 | H | -4.25222600 | 4.73258200  | 1.31900800  |
| N | -4.48866700 | -5.22554900 | 0.11199600  | H | -3.43194900 | 6.00872700  | 2.23069700  |
| C | 4.48466900  | 4.05633900  | 0.98306900  | C | -0.07532400 | -6.97940300 | 2.56816600  |
| H | 3.53171600  | 3.97888500  | 1.50307300  | H | -0.44493700 | -5.99997600 | 2.86270800  |
| H | 4.65667000  | 3.12859400  | 0.42673000  | H | -0.89306600 | -7.55278500 | 2.12065300  |
| H | 5.27904900  | 4.17127200  | 1.72582700  | H | 0.27284200  | -7.51067300 | 3.45655300  |
| C | 5.79103800  | 5.55450100  | -0.46970600 | C | 1.83168700  | -8.05433600 | 1.40869600  |
| H | 5.67968600  | 6.29277600  | -1.26059800 | H | 2.47872200  | -8.28038500 | 2.26023000  |
| H | 6.48292600  | 5.94190400  | 0.28447000  | H | 1.14397100  | -8.89197900 | 1.26846200  |
| H | 6.23139100  | 4.65030700  | -0.90428100 | H | 2.43761400  | -7.95288200 | 0.51167800  |
| C | 2.35401600  | 7.75718100  | -1.44876700 | C | -2.35401600 | -7.75718100 | -1.44876700 |
| H | 1.55657100  | 8.22703100  | -0.85932700 | H | -1.55657100 | -8.22703100 | -0.85932700 |
| H | 2.82704200  | 8.53253000  | -2.05674400 | H | -2.82704200 | -8.53253000 | -2.05674400 |
| H | 1.91170100  | 7.00836800  | -2.10094100 | H | -1.91170100 | -7.00836800 | -2.10094100 |
| C | 4.20985000  | 8.07741400  | 0.14327600  | C | -4.20985000 | -8.07741400 | 0.14327600  |
| H | 4.95005100  | 8.55195400  | -0.50771800 | H | -4.95005100 | -8.55195400 | -0.50771800 |
| H | 3.58473500  | 8.86636300  | 0.57416000  | H | -3.58473500 | -8.86636300 | 0.57416000  |

|                                     |             |             |             |   |             |             |             |
|-------------------------------------|-------------|-------------|-------------|---|-------------|-------------|-------------|
| H                                   | -4.72570300 | -7.56633400 | 0.95258600  | C | 0.90493300  | 4.27093000  | -1.85476900 |
| C                                   | 3.68469000  | -5.66348600 | 1.23092800  | C | 1.51082900  | 3.05575500  | -2.19067400 |
| H                                   | 4.31920100  | -6.40702900 | 0.74145400  | H | 1.23789900  | 5.18834200  | -2.32716600 |
| H                                   | 4.25222600  | -4.73258200 | 1.31900800  | H | 2.30755700  | 3.06020500  | -2.92773400 |
| H                                   | 3.43194900  | -6.00872700 | 2.23069700  | C | 0.36616700  | -0.65718500 | 0.01994200  |
| C                                   | 2.66870100  | -4.67060500 | -0.79621500 | C | -0.06006700 | -1.85056600 | -0.66348800 |
| H                                   | 1.75540400  | -4.67422400 | -1.38639700 | C | 1.44664600  | -0.71524600 | 0.87528500  |
| H                                   | 2.96785500  | -3.63533800 | -0.61100000 | C | -1.13093300 | -1.85394100 | -1.63145700 |
| H                                   | 3.45683000  | -5.17144000 | -1.36357900 | C | 0.63809400  | -3.09867800 | -0.38142800 |
| C                                   | -4.48466900 | -4.05633900 | 0.98306900  | C | 2.16195600  | -1.89575700 | 1.09327600  |
| H                                   | -3.53171600 | -3.97888500 | 1.50307300  | C | -1.51082900 | -3.05575500 | -2.19067400 |
| H                                   | -4.65667000 | -3.12859400 | 0.42673000  | C | 0.15168800  | -4.31985800 | -0.96809500 |
| H                                   | -5.27904900 | -4.17127200 | 1.72582700  | C | 1.77899900  | -3.08167100 | 0.49578900  |
| C                                   | -5.79103800 | -5.55450100 | -0.46970600 | H | 3.04002600  | -1.88848000 | 1.72949200  |
| H                                   | -5.67968600 | -6.29277600 | -1.26059800 | C | -0.90493300 | -4.27093000 | -1.85476900 |
| H                                   | -6.48292600 | -5.94190400 | 0.28447000  | H | -2.30755700 | -3.06020500 | -2.92773400 |
| H                                   | -6.23139100 | -4.65030700 | -0.90428100 | H | 1.75061500  | 0.18943900  | 1.39123200  |
| H                                   | -3.69349100 | -3.90265000 | -2.19979100 | H | -1.75061500 | -0.18943900 | 1.39123200  |
| H                                   | 0.75542200  | 5.41422600  | 0.37522200  | C | 1.85910400  | 0.62190300  | -2.13089100 |
| H                                   | -0.75542200 | -5.41422600 | 0.37522200  | H | 2.51905800  | 0.18343900  | -1.38036800 |
| <b>6</b>                            |             |             |             | H | 1.18200500  | -0.16986400 | -2.45314100 |
| Electronic energy = -1527.77681 a.u |             |             |             | H | 2.47232800  | 0.89896200  | -2.99155300 |
| C                                   | -1.44664600 | 0.71524600  | 0.87528500  | C | -1.85910400 | -0.62190300 | -2.13089100 |
| C                                   | -0.36616700 | 0.65718500  | 0.01994200  | H | -2.51905800 | -0.18343900 | -1.38036800 |
| C                                   | 0.06006700  | 1.85056600  | -0.66348800 | H | -1.18200500 | 0.16986400  | -2.45314100 |
| C                                   | -0.63809400 | 3.09867800  | -0.38142800 | H | -2.47232800 | -0.89896200 | -2.99155300 |
| C                                   | -1.77899900 | 3.08167100  | 0.49578900  | H | -1.23789900 | -5.18834200 | -2.32716600 |
| C                                   | -2.16195600 | 1.89575700  | 1.09327600  | C | 2.80910400  | -4.66142800 | 1.83761900  |
| C                                   | 1.13093300  | 1.85394100  | -1.63145700 | C | 2.60875000  | -4.75597000 | 3.26443500  |
| C                                   | -0.15168800 | 4.31985800  | -0.96809500 | C | 3.46989900  | -5.59457500 | 2.69123100  |
| H                                   | -3.04002600 | 1.88848000  | 1.72949200  | N | 2.59530900  | -4.21470400 | 0.68083200  |
|                                     |             |             |             | N | 0.77216700  | -5.56199300 | -0.72051900 |

|                                      |             |             |             |   |             |             |             |
|--------------------------------------|-------------|-------------|-------------|---|-------------|-------------|-------------|
| C                                    | 0.07257800  | -6.53611800 | -0.33374200 | H | 4.78154500  | 2.21772600  | 2.27135600  |
| C                                    | -1.13093300 | -7.18084400 | 0.13679200  | H | 2.47273700  | 2.82844500  | 2.83281800  |
| C                                    | -0.02651100 | -7.91545700 | 0.01902600  | C | -0.72707100 | 0.25918000  | -0.26123500 |
| N                                    | -2.59530900 | 4.21470400  | 0.68083200  | C | -1.77607300 | -0.54522200 | 0.30687300  |
| C                                    | -2.80910400 | 4.66142800  | 1.83761900  | C | -1.06266100 | 1.38782400  | -0.98349600 |
| C                                    | -3.46989900 | 5.59457500  | 2.69123100  | C | -1.51801000 | -1.67501900 | 1.16919200  |
| C                                    | -2.60875000 | 4.75597000  | 3.26443500  | C | -3.15359300 | -0.18475300 | 0.02167400  |
| N                                    | -0.77216700 | 5.56199300  | -0.72051900 | C | -2.38679800 | 1.79496200  | -1.16385100 |
| C                                    | -0.07257800 | 6.53611800  | -0.33374200 | C | -2.57947400 | -2.44736900 | 1.59815400  |
| C                                    | 1.13093300  | 7.18084400  | 0.13679200  | C | -4.18397900 | -1.08680200 | 0.44826100  |
| C                                    | 0.02651100  | 7.91545700  | 0.01902600  | C | -3.43245000 | 1.04661100  | -0.66637200 |
| H                                    | 4.16580200  | -6.40735000 | 2.84027600  | H | -2.58834500 | 2.69137500  | -1.73663300 |
| H                                    | 2.14604200  | -4.44188800 | 4.18836700  | C | -3.90072600 | -2.18535700 | 1.21917400  |
| H                                    | 0.41510900  | -8.89529600 | 0.12935000  | H | -2.38695500 | -3.28587300 | 2.25675200  |
| H                                    | -2.17677300 | -7.17440000 | 0.40595800  | H | -0.26647500 | 1.96742700  | -1.43558700 |
| H                                    | -2.14604200 | 4.44188800  | 4.18836700  | H | 0.20495500  | -1.59544300 | -1.75889000 |
| H                                    | -4.16580200 | 6.40735000  | 2.84027600  | C | 0.19157000  | 1.90782200  | 1.97700000  |
| H                                    | 2.17677300  | 7.17440000  | 0.40595800  | H | -0.36727700 | 2.54310000  | 1.28546900  |
| H                                    | -0.41510900 | 8.89529600  | 0.12935000  | H | -0.44653300 | 1.05338300  | 2.20962000  |
| <b>6H<sup>+</sup></b>                |             |             |             | H | 0.32543200  | 2.47127700  | 2.90254900  |
| Electronic energy = -1528.21518 a.u. |             |             |             | C | -0.15517900 | -2.05773700 | 1.70068700  |
| C                                    | 1.01790200  | -1.10832300 | -1.22993100 | H | 0.46548400  | -2.53623900 | 0.94154600  |
| C                                    | 0.72098600  | -0.12980700 | -0.30135500 | H | 0.40546300  | -1.19836400 | 2.06652900  |
| C                                    | 1.78451100  | 0.53733200  | 0.40269900  | H | -0.27859900 | -2.75806800 | 2.52890800  |
| C                                    | 3.15461500  | 0.18034300  | 0.06611700  | H | -4.69040400 | -2.83969000 | 1.56608300  |
| C                                    | 3.40055500  | -0.79761100 | -0.96149600 | C | -5.10533000 | 2.67494200  | -0.99573900 |
| C                                    | 2.33268200  | -1.44408300 | -1.55934400 | C | -4.84821800 | 4.07205000  | -1.10098300 |
| C                                    | 1.55304000  | 1.50611600  | 1.44380300  | C | -6.11031000 | 3.65083400  | -1.18723500 |
| C                                    | 4.24124900  | 0.80729500  | 0.77054100  | N | -4.78938500 | 1.44869400  | -0.83071300 |
| H                                    | 2.52849500  | -2.16257900 | -2.34653200 | N | -5.52654300 | -0.82373300 | 0.02216700  |
| C                                    | 3.96190600  | 1.76844300  | 1.72266800  | C | -6.51134800 | -1.64909800 | 0.01483300  |
| C                                    | 2.64337500  | 2.09981200  | 2.04681100  | C | -7.10795900 | -2.90457700 | 0.24484700  |



|                                     |             |             |             |   |             |             |             |
|-------------------------------------|-------------|-------------|-------------|---|-------------|-------------|-------------|
| C                                   | -7.85613000 | -1.93036100 | -0.27568600 | H | -3.01022100 | 2.36866400  | 2.60441000  |
| N                                   | 4.68583100  | -1.02490600 | -1.47375600 | C | -0.18301300 | -0.73066700 | -0.36087800 |
| C                                   | 5.24826000  | -2.14679300 | -1.34374400 | C | 0.53441200  | -1.77224900 | 0.32576700  |
| C                                   | 6.36500700  | -2.99152700 | -1.59212600 | C | -1.19400900 | -1.06700900 | -1.23747800 |
| C                                   | 5.39250600  | -3.47655200 | -0.82185300 | C | 1.56823600  | -1.50657300 | 1.29808400  |
| N                                   | 5.56974800  | 0.37434800  | 0.61341700  | C | 0.18301300  | -3.15300400 | 0.03472000  |
| C                                   | 6.46164000  | 1.19089300  | 0.24866200  | C | -1.58523800 | -2.39071900 | -1.45606200 |
| C                                   | 6.95131000  | 2.44560300  | -0.25075800 | C | 2.24396100  | -2.56728000 | 1.86482100  |
| C                                   | 7.82666800  | 1.46251100  | -0.04691000 | C | 0.98328300  | -4.18893500 | 0.62611100  |
| H                                   | -7.14639600 | 3.92419000  | -1.31849000 | C | -0.94010500 | -3.43353100 | -0.82605700 |
| H                                   | -4.17268000 | 4.91330500  | -1.11681600 | H | -2.38856700 | -2.59214500 | -2.15215300 |
| H                                   | -8.81672800 | -1.61232900 | -0.64978400 | C | 1.97951500  | -3.89695600 | 1.52225900  |
| H                                   | -7.04034200 | -3.92455600 | 0.58816900  | H | 3.01022100  | -2.36866400 | 2.60441000  |
| H                                   | 5.04839800  | -4.31265100 | -0.23217100 | H | -1.70101000 | -0.27745500 | -1.78021800 |
| H                                   | 7.32988400  | -3.17249200 | -2.04197700 | H | 1.70101000  | 0.27745500  | -1.78021800 |
| H                                   | 6.80544900  | 3.46268900  | -0.58169200 | C | -1.95999900 | 0.13033400  | 1.78988900  |
| H                                   | 8.86014100  | 1.15419700  | -0.10235700 | H | -2.48795700 | -0.44730200 | 1.02967500  |
| H                                   | -5.59964800 | 0.16084900  | -0.40593700 | H | -1.10229200 | -0.46310300 | 2.10673500  |
| <b>6H<sub>2</sub><sup>2+</sup></b>  |             |             |             | H | -2.62371600 | 0.23251300  | 2.64942600  |
| Electronic energy = -1528.58475 a.u |             |             |             | C | 1.95999900  | -0.13033400 | 1.78988900  |
| C                                   | 1.19400900  | 1.06700900  | -1.23747800 | H | 2.48795700  | 0.44730200  | 1.02967500  |
| C                                   | 0.18301300  | 0.73066700  | -0.36087800 | H | 1.10229200  | 0.46310300  | 2.10673500  |
| C                                   | -0.53441200 | 1.77224900  | 0.32576700  | H | 2.62371600  | -0.23251300 | 2.64942600  |
| C                                   | -0.18301300 | 3.15300400  | 0.03472000  | H | 2.55658000  | -4.68464300 | 1.98792800  |
| C                                   | 0.94010500  | 3.43353100  | -0.82605700 | C | -2.50263200 | -5.09873600 | -1.42755900 |
| C                                   | 1.58523800  | 2.39071900  | -1.45606200 | C | -3.84306400 | -4.84867600 | -1.82888700 |
| C                                   | -1.56823600 | 1.50657300  | 1.29808400  | C | -3.41774600 | -6.11257600 | -1.78045300 |
| C                                   | -0.98328300 | 4.18893500  | 0.62611100  | N | -1.32994600 | -4.78373200 | -1.02068800 |
| H                                   | 2.38856700  | 2.59214500  | -2.15215300 | N | 0.73303400  | -5.54482000 | 0.24134300  |
| C                                   | -1.97951500 | 3.89695600  | 1.52225900  | C | 1.48125300  | -6.56981300 | 0.46549100  |
| C                                   | -2.24396100 | 2.56728000  | 1.86482100  | C | 2.61927400  | -7.21596800 | 0.97954500  |
| H                                   | -2.55658000 | 4.68464300  | 1.98792800  | C | 1.71434300  | -7.94441800 | 0.32128400  |

|                                     |             |             |             |   |             |             |             |
|-------------------------------------|-------------|-------------|-------------|---|-------------|-------------|-------------|
| N                                   | 1.32994600  | 4.78373200  | -1.02068800 | H | 0.87159100  | 3.76319000  | -3.29142900 |
| C                                   | 2.50263200  | 5.09873600  | -1.42755900 | C | 0.60449500  | -0.44753800 | -0.38971000 |
| C                                   | 3.41774600  | 6.11257600  | -1.78045300 | C | 0.70050200  | -1.71990500 | -1.05781000 |
| C                                   | 3.84306400  | 4.84867600  | -1.82888700 | C | 1.62459600  | -0.04909200 | 0.44972400  |
| N                                   | -0.73303400 | 5.54482000  | 0.24134300  | C | -0.28017500 | -2.16612800 | -2.01908200 |
| C                                   | -1.48125300 | 6.56981300  | 0.46549100  | C | 1.84232000  | -2.57742900 | -0.76382400 |
| C                                   | -2.61927400 | 7.21596800  | 0.97954500  | C | 2.77183300  | -0.82161500 | 0.64854700  |
| C                                   | -1.71434300 | 7.94441800  | 0.32128400  | C | -0.15142300 | -3.43324700 | -2.54815700 |
| H                                   | -3.66039600 | -7.15422500 | -1.92831800 | C | 1.86175900  | -3.92555800 | -1.28076500 |
| H                                   | -4.66282700 | -4.18057000 | -2.04424400 | C | 2.91182900  | -2.07078500 | 0.06176400  |
| H                                   | 1.40715900  | -8.91098400 | -0.04763800 | H | 3.59192600  | -0.42925000 | 1.24117500  |
| H                                   | 3.55475800  | -7.18481100 | 1.51588400  | C | 0.87113500  | -4.31038200 | -2.17111700 |
| H                                   | 4.66282700  | 4.18057000  | -2.04424400 | H | -0.87159100 | -3.76319000 | -3.29142900 |
| H                                   | 3.66039600  | 7.15422500  | -1.92831800 | H | 1.53621600  | 0.90817100  | 0.95386400  |
| H                                   | -3.55475800 | 7.18481100  | 1.51588400  | H | -1.53621600 | -0.90817100 | 0.95386400  |
| H                                   | -1.40715900 | 8.91098400  | -0.04763800 | C | 1.42838100  | 1.32853000  | -2.54725400 |
| H                                   | 0.15995700  | 5.61139800  | -0.34966100 | H | 2.22401800  | 1.18137200  | -1.81439900 |
| H                                   | -0.15995700 | -5.61139800 | -0.34966100 | H | 1.11701800  | 0.33454000  | -2.87061800 |
| <b>7</b>                            |             |             |             | H | 1.86342100  | 1.83358000  | -3.41368600 |
| Electronic energy = -1970.86558 a.u |             |             |             | C | -1.42838100 | -1.32853000 | -2.54725400 |
| C                                   | -1.62459600 | 0.04909200  | 0.44972400  | H | -2.22401800 | -1.18137200 | -1.81439900 |
| C                                   | -0.60449500 | 0.44753800  | -0.38971000 | H | -1.11701800 | -0.33454000 | -2.87061800 |
| C                                   | -0.70050200 | 1.71990500  | -1.05781000 | H | -1.86342100 | -1.83358000 | -3.41368600 |
| C                                   | -1.84232000 | 2.57742900  | -0.76382400 | H | 0.92512600  | -5.29686300 | -2.61957800 |
| C                                   | -2.91182900 | 2.07078500  | 0.06176400  | C | 4.61044500  | -2.94314600 | 1.35712200  |
| C                                   | -2.77183300 | 0.82161500  | 0.64854700  | C | 4.55433100  | -2.97053500 | 2.78529700  |
| C                                   | 0.28017500  | 2.16612800  | -2.01908200 | C | 5.66873500  | -3.41585100 | 2.16966000  |
| C                                   | -1.86175900 | 3.92555800  | -1.28076500 | N | 4.13060800  | -2.74772000 | 0.19493600  |
| H                                   | -3.59192600 | 0.42925000  | 1.24117500  | N | 2.86793500  | -4.83648400 | -0.92995400 |
| C                                   | -0.87113500 | 4.31038200  | -2.17111700 | C | 2.51126100  | -6.02048400 | -0.61274900 |
| C                                   | 0.15142300  | 3.43324700  | -2.54815700 | C | 1.55523200  | -7.02570900 | -0.27231900 |
| H                                   | -0.92512600 | 5.29686300  | -2.61957800 | C | 2.86793500  | -7.33965700 | -0.24815100 |

|   |             |             |             |                       |             |                         |
|---|-------------|-------------|-------------|-----------------------|-------------|-------------------------|
| N | -4.13060800 | 2.74772000  | 0.19493600  | <b>7H<sup>+</sup></b> |             |                         |
| C | -4.61044500 | 2.94314600  | 1.35712200  | Electronic energy =   | -1971.33402 | a.u                     |
| C | -5.66873500 | 3.41585100  | 2.16966000  | C                     | -1.06915900 | 1.18102600 0.90948600   |
| C | -4.55433100 | 2.97053500  | 2.78529700  | C                     | -0.77327200 | 0.22197100 -0.03935100  |
| N | -2.86793500 | 4.83648400  | -0.92995400 | C                     | -1.85650700 | -0.45168100 -0.70662300 |
| C | -2.51126100 | 6.02048400  | -0.61274900 | C                     | -3.21879400 | -0.07997600 -0.35673100 |
| C | -1.55523200 | 7.02570900  | -0.27231900 | C                     | -3.45836800 | 1.00172700 0.56494000   |
| C | -2.86793500 | 7.33965700  | -0.24815100 | C                     | -2.37810900 | 1.56739800 1.21604600   |
| N | 0.25918700  | -7.36860200 | -0.03738800 | C                     | -1.65298200 | -1.48993900 -1.69354600 |
| H | -0.43691200 | -6.75925200 | -0.44176700 | C                     | -4.29749800 | -0.80583200 -0.95711200 |
| H | 0.01585000  | -8.34824300 | -0.03002200 | H                     | -2.54637600 | 2.31966400 1.97832700   |
| N | 3.85660200  | -8.23697900 | 0.03552400  | C                     | -4.06888600 | -1.73398400 -1.94259100 |
| H | 3.61679100  | -9.21722200 | 0.03014200  | C                     | -2.75376500 | -2.06311300 -2.29753700 |
| H | 4.76313800  | -8.02867000 | -0.35562900 | H                     | -4.90019600 | -2.20175600 -2.45841800 |
| N | 3.83539700  | -2.79002000 | 3.92913400  | H                     | -2.59649300 | -2.80891300 -3.06847900 |
| H | 4.33820600  | -2.73326400 | 4.80267600  | C                     | 0.68600000  | 0.07919100 -0.37485100  |
| H | 3.04422100  | -2.16750000 | 3.85680800  | C                     | 1.63751800  | -0.74521800 0.32478400  |
| N | 6.89535600  | -4.01341300 | 2.24313200  | C                     | 1.11996400  | 0.91561700 -1.38517700  |
| H | 7.47550900  | -3.91593900 | 1.42299700  | C                     | 1.26197800  | -1.65629500 1.37817500  |
| H | 7.39890900  | -3.93789000 | 3.11471000  | C                     | 3.03826800  | -0.65617700 -0.06377400 |
| N | -0.25918700 | 7.36860200  | -0.03738800 | C                     | 2.44403000  | 0.92444500 -1.82658200  |
| H | 0.43691200  | 6.75925200  | -0.44176700 | C                     | 2.25899800  | -2.35794100 2.02595600  |
| H | -0.01585000 | 8.34824300  | -0.03002200 | C                     | 4.03975900  | -1.33201300 0.73094300  |
| N | -3.85660200 | 8.23697900  | 0.03552400  | C                     | 3.40865400  | 0.12751600 -1.22101200  |
| H | -3.61679100 | 9.21722200  | 0.03014200  | H                     | 2.71946600  | 1.50636500 -2.69953100  |
| H | -4.76313800 | 8.02867000  | -0.35562900 | C                     | 3.61467000  | -2.19179100 1.73653700  |
| N | -3.83539700 | 2.79002000  | 3.92913400  | H                     | 1.97831000  | -3.06539100 2.80084700  |
| H | -4.33820600 | 2.73326400  | 4.80267600  | H                     | 0.39449200  | 1.54979700 -1.88619800  |
| H | -3.04422100 | 2.16750000  | 3.85680800  | H                     | -0.24509300 | 1.66062700 1.42579000   |
| N | -6.89535600 | 4.01341300  | 2.24313200  | C                     | -0.30485800 | -2.02391900 -2.12306400 |
| H | -7.47550900 | 3.91593900  | 1.42299700  | H                     | 0.30997000  | -1.26686400 -2.60965900 |
| H | -7.39890900 | 3.93789000  | 3.11471000  | H                     | 0.27721900  | -2.40446500 -1.28293700 |

|   |             |             |             |                                     |             |             |             |
|---|-------------|-------------|-------------|-------------------------------------|-------------|-------------|-------------|
| H | -0.45258000 | -2.84590700 | -2.82642000 | H                                   | 7.74251300  | 0.44310900  | -3.88706100 |
| C | -0.15858700 | -1.94337800 | 1.82486800  | H                                   | 8.15377800  | 2.09046400  | -3.81701000 |
| H | -0.63904600 | -1.09007100 | 2.30865100  | N                                   | -6.60424400 | -4.08704700 | -1.02122200 |
| H | -0.81034300 | -2.25345000 | 1.00539300  | H                                   | -5.64375900 | -4.31317900 | -1.22850200 |
| H | -0.14127100 | -2.76082800 | 2.54952000  | H                                   | -7.25692500 | -4.84775200 | -0.92286100 |
| H | 4.35336800  | -2.76962700 | 2.28088200  | N                                   | -9.03322600 | -1.68122800 | 0.36922500  |
| C | 5.35185600  | 1.02595700  | -2.11954900 | H                                   | -9.75607000 | -2.38235100 | 0.37578200  |
| C | 5.69882200  | 2.40792500  | -2.07117600 | H                                   | -9.30259200 | -0.73029500 | 0.56020400  |
| C | 6.51360200  | 1.55201000  | -2.72636200 | N                                   | -3.47343400 | 4.94259200  | 1.01183000  |
| N | 4.65682800  | 0.00049700  | -1.81738900 | H                                   | -3.65352100 | 5.93384500  | 1.02619700  |
| N | 5.39763400  | -1.15065400 | 0.48577500  | H                                   | -2.60281700 | 4.64132800  | 0.60332000  |
| C | 6.19654000  | -1.07297300 | 1.48578700  | N                                   | -7.04459300 | 4.25060000  | 1.60158800  |
| C | 6.52050400  | -0.92056500 | 2.86378000  | H                                   | -7.72175200 | 3.58697300  | 1.94357100  |
| C | 7.52216400  | -0.96696800 | 1.95486600  | H                                   | -7.15104200 | 5.19041100  | 1.95223600  |
| N | -4.77770500 | 1.46638700  | 0.78513200  | H                                   | -5.70517500 | 0.30717200  | 0.07471400  |
| C | -4.94554300 | 2.73293400  | 1.01653800  | <b>7H<sub>2</sub><sup>2+</sup></b>  |             |             |             |
| C | -5.79873200 | 3.79751200  | 1.33152000  | Electronic energy = -1971.74603 a.u |             |             |             |
| C | -4.49009700 | 4.06620300  | 1.07873700  | C                                   | -1.12486800 | 1.14717700  | 1.15809500  |
| N | -5.62843000 | -0.58208400 | -0.49241600 | C                                   | -0.13555900 | 0.74087400  | 0.28478600  |
| C | -6.53225600 | -1.53178000 | -0.42896500 | C                                   | 0.62242700  | 1.73587600  | -0.42617900 |
| C | -6.91339700 | -2.85702500 | -0.60631700 | C                                   | 0.32857500  | 3.13897200  | -0.16978400 |
| C | -7.81592700 | -1.95488900 | -0.11063000 | C                                   | -0.66919500 | 3.50189700  | 0.81196100  |
| N | 6.11382300  | -0.73778800 | 4.14685600  | C                                   | -1.40426700 | 2.49214000  | 1.41163900  |
| H | 5.16305600  | -1.00014800 | 4.35967900  | C                                   | 1.64379800  | 1.40409800  | -1.39258200 |
| H | 6.77903200  | -0.88585000 | 4.89125600  | C                                   | 1.06126500  | 4.13174100  | -0.90331900 |
| N | 8.84446900  | -0.86423200 | 1.66353100  | H                                   | -2.21514200 | 2.74589200  | 2.08363900  |
| H | 9.51541200  | -1.00223100 | 2.40366300  | C                                   | 2.09082100  | 3.77517700  | -1.74099000 |
| H | 9.13545300  | -1.18943400 | 0.75440700  | C                                   | 2.35998400  | 2.42345500  | -1.98368100 |
| N | 5.46281500  | 3.65881800  | -1.58960000 | H                                   | 2.70712600  | 4.53472300  | -2.20688900 |
| H | 5.94525700  | 4.43557700  | -2.01666200 | H                                   | 3.15662700  | 2.17142600  | -2.67445000 |
| H | 4.52069000  | 3.85597400  | -1.28881700 | C                                   | 0.13555900  | -0.74087400 | 0.28478600  |
| N | 7.68285000  | 1.31290100  | -3.37958900 | C                                   | -0.62242700 | -1.73587600 | -0.42617900 |

|   |             |             |             |          |             |             |             |
|---|-------------|-------------|-------------|----------|-------------|-------------|-------------|
| C | 1.12486800  | -1.14717700 | 1.15809500  | C        | -1.67024400 | 4.90516800  | 3.64209400  |
| C | -1.64379800 | -1.40409800 | -1.39258200 | N        | 0.70860100  | 5.50147800  | -0.76386500 |
| C | -0.32857500 | -3.13897200 | -0.16978400 | C        | 0.92096400  | 6.41967000  | -1.68372500 |
| C | 1.40426700  | -2.49214000 | 1.41163900  | C        | 1.35016100  | 6.81027000  | -2.94618400 |
| C | -2.35998400 | -2.42345500 | -1.98368100 | C        | 0.84108800  | 7.74612000  | -2.08262000 |
| C | -1.06126500 | -4.13174100 | -0.90331900 | N        | -1.90151200 | -6.50182600 | -4.11970800 |
| C | 0.66919500  | -3.50189700 | 0.81196100  | H        | -2.03140500 | -5.53691500 | -4.37962100 |
| H | 2.21514200  | -2.74589200 | 2.08363900  | H        | -2.04025000 | -7.20345700 | -4.82944400 |
| C | -2.09082100 | -3.77517700 | -1.74099000 | N        | -0.49458200 | -9.00794300 | -1.82633300 |
| H | -3.15662700 | -2.17142600 | -2.67445000 | H        | -0.67558100 | -9.74054500 | -2.49412800 |
| H | 1.70360100  | -0.38895500 | 1.67491100  | H        | -0.20478800 | -9.28182100 | -0.90166400 |
| H | -1.70360100 | 0.38895500  | 1.67491100  | N        | 1.79903300  | -4.03176100 | 4.65385100  |
| C | 1.99421700  | 0.00046200  | -1.84006400 | H        | 2.02723900  | -4.35695500 | 5.58023800  |
| H | 2.47067200  | -0.58803200 | -1.05491300 | H        | 1.35197800  | -3.13202000 | 4.58330400  |
| H | 1.12085700  | -0.56085100 | -2.17397700 | N        | 2.16190400  | -7.45489600 | 3.37288300  |
| H | 2.68906400  | 0.05709400  | -2.67985200 | H        | 2.34184100  | -8.04937800 | 2.57952500  |
| C | -1.99421700 | -0.00046200 | -1.84006400 | H        | 2.63218800  | -7.70950900 | 4.22792300  |
| H | -2.47067200 | 0.58803200  | -1.05491300 | N        | 1.90151200  | 6.50182600  | -4.11970800 |
| H | -1.12085700 | 0.56085100  | -2.17397700 | H        | 2.03140500  | 5.53691500  | -4.37962100 |
| H | -2.68906400 | -0.05709400 | -2.67985200 | H        | 2.04025000  | 7.20345700  | -4.82944400 |
| H | -2.70712600 | -4.53472300 | -2.20688900 | N        | 0.49458200  | 9.00794300  | -1.82633300 |
| C | 1.35016100  | -5.17452000 | 2.29857400  | H        | 0.67558100  | 9.74054500  | -2.49412800 |
| C | 1.67024400  | -4.90516800 | 3.64209400  | H        | 0.20478800  | 9.28182100  | -0.90166400 |
| C | 1.83424600  | -6.16757200 | 3.15538900  | N        | -1.79903300 | 4.03176100  | 4.65385100  |
| N | 0.88985600  | -4.85509700 | 1.12161000  | H        | -2.02723900 | 4.35695500  | 5.58023800  |
| N | -0.70860100 | -5.50147800 | -0.76386500 | H        | -1.35197800 | 3.13202000  | 4.58330400  |
| C | -0.92096400 | -6.41967000 | -1.68372500 | N        | -2.16190400 | 7.45489600  | 3.37288300  |
| C | -1.35016100 | -6.81027000 | -2.94618400 | H        | -2.34184100 | 8.04937800  | 2.57952500  |
| C | -0.84108800 | -7.74612000 | -2.08262000 | H        | -2.63218800 | 7.70950900  | 4.22792300  |
| N | -0.88985600 | 4.85509700  | 1.12161000  | H        | 0.03487300  | 5.65599700  | 0.03586300  |
| C | -1.35016100 | 5.17452000  | 2.29857400  | H        | -0.03487300 | -5.65599700 | 0.03586300  |
| C | -1.83424600 | 6.16757200  | 3.15538900  | <b>8</b> |             |             |             |

Electronic energy = -2599.91967 a.u

|   |             |             |             |   |             |             |             |
|---|-------------|-------------|-------------|---|-------------|-------------|-------------|
| C | 0.00099800  | 1.60999300  | -0.01135000 | C | -1.37809300 | 1.37934800  | -3.03294300 |
| C | 0.42395100  | 0.62218100  | -0.87729700 | H | -1.27471800 | 2.15470300  | -2.27182700 |
| C | 1.67285400  | 0.78747300  | -1.57574100 | H | -0.36884200 | 1.13462800  | -3.36671500 |
| C | 2.47414100  | 1.97600200  | -1.30098500 | H | -1.90722600 | 1.81651700  | -3.88361600 |
| C | 1.95013400  | 2.99540100  | -0.42332200 | H | -5.16602000 | -1.24684000 | -3.27354300 |
| C | 0.72714300  | 2.78556900  | 0.19436100  | C | -2.91653600 | -4.66498100 | 0.88519400  |
| C | 2.14996500  | -0.16825000 | -2.54734600 | C | -3.19670200 | -4.56740600 | 2.28753300  |
| C | 3.78529400  | 2.09513600  | -1.89402100 | C | -3.45450500 | -5.73476500 | 1.63785800  |
| H | 0.32519800  | 3.56825000  | 0.82915300  | N | -2.57241900 | -4.23837300 | -0.26583300 |
| C | 4.20052400  | 1.12856400  | -2.79347500 | N | -4.63152400 | -3.18490900 | -1.64509700 |
| C | 3.38619900  | 0.04039000  | -3.12262300 | C | -5.79243800 | -2.98698900 | -1.15205000 |
| H | 5.16602000  | 1.24684000  | -3.27354300 | C | -6.82968300 | -2.23072800 | -0.51221200 |
| H | 3.74121800  | -0.66759400 | -3.86588500 | C | -7.02967600 | -3.55270500 | -0.76522200 |
| C | -0.42395100 | -0.62218100 | -0.87729700 | N | 2.57241900  | 4.23837300  | -0.26583300 |
| C | -1.67285400 | -0.78747300 | -1.57574100 | C | 2.91653600  | 4.66498100  | 0.88519400  |
| C | -0.00099800 | -1.60999300 | -0.01135000 | C | 3.45450500  | 5.73476500  | 1.63785800  |
| C | -2.14996500 | 0.16825000  | -2.54734600 | C | 3.19670200  | 4.56740600  | 2.28753300  |
| C | -2.47414100 | -1.97600200 | -1.30098500 | N | 4.63152400  | 3.18490900  | -1.64509700 |
| C | -0.72714300 | -2.78556900 | 0.19436100  | C | 5.79243800  | 2.98698900  | -1.15205000 |
| C | -3.38619900 | -0.04039000 | -3.12262300 | C | 6.82968300  | 2.23072800  | -0.51221200 |
| C | -3.78529400 | -2.09513600 | -1.89402100 | C | 7.02967600  | 3.55270500  | -0.76522200 |
| C | -1.95013400 | -2.99540100 | -0.42332200 | N | -7.24461800 | -1.07379700 | 0.06957100  |
| H | -0.32519800 | -3.56825000 | 0.82915300  | N | -7.75171700 | -4.70081900 | -0.65897600 |
| C | -4.20052400 | -1.12856400 | -2.79347500 | N | -3.28633200 | -3.80471900 | 3.41058400  |
| H | -3.74121800 | 0.66759400  | -3.86588500 | N | -3.96651400 | -6.99324200 | 1.58450000  |
| H | 0.93812200  | -1.47015000 | 0.51482800  | N | 7.24461800  | 1.07379700  | 0.06957100  |
| H | -0.93812200 | 1.47015000  | 0.51482800  | N | 7.75171700  | 4.70081900  | -0.65897600 |
| C | 1.37809300  | -1.37934800 | -3.03294300 | N | 3.28633200  | 3.80471900  | 3.41058400  |
| H | 1.27471800  | -2.15470300 | -2.27182700 | N | 3.96651400  | 6.99324200  | 1.58450000  |
| H | 0.36884200  | -1.13462800 | -3.36671500 | C | 4.20052400  | 7.71906000  | 2.82239600  |
| H | 1.90722600  | -1.81651700 | -3.88361600 | H | 4.72884000  | 7.08360400  | 3.53422400  |
|   |             |             |             | H | 4.82867800  | 8.58814700  | 2.61461200  |

|   |             |             |             |                       |             |             |             |
|---|-------------|-------------|-------------|-----------------------|-------------|-------------|-------------|
| H | 3.26713900  | 8.07005100  | 3.28939700  | H                     | -2.95164300 | -1.87025800 | 4.13855400  |
| C | 3.57197500  | 7.79847400  | 0.42913200  | C                     | -3.56412900 | -4.46270200 | 4.67761400  |
| H | 3.45957000  | 7.14803500  | -0.43772200 | H                     | -4.39224100 | -5.16307400 | 4.56085100  |
| H | 2.62051000  | 8.32326800  | 0.59865100  | H                     | -2.69269900 | -5.00973900 | 5.07003100  |
| H | 4.34654800  | 8.54133700  | 0.22172000  | H                     | -3.85853400 | -3.71164000 | 5.41386700  |
| C | 3.56412900  | 4.46270200  | 4.67761400  | C                     | -4.20052400 | -7.71906000 | 2.82239600  |
| H | 4.39224100  | 5.16307400  | 4.56085100  | H                     | -4.72884000 | -7.08360400 | 3.53422400  |
| H | 2.69269900  | 5.00973900  | 5.07003100  | H                     | -4.82867800 | -8.58814700 | 2.61461200  |
| H | 3.85853400  | 3.71164000  | 5.41386700  | H                     | -3.26713900 | -8.07005100 | 3.28939700  |
| C | 2.46491500  | 2.59909200  | 3.48516600  | C                     | -3.57197500 | -7.79847400 | 0.42913200  |
| H | 1.46114000  | 2.80943800  | 3.88213900  | H                     | -3.45957000 | -7.14803500 | -0.43772200 |
| H | 2.35554300  | 2.16917700  | 2.49088000  | H                     | -2.62051000 | -8.32326800 | 0.59865100  |
| H | 2.95164300  | 1.87025800  | 4.13855400  | H                     | -4.34654800 | -8.54133700 | 0.22172000  |
| C | 6.58172500  | -0.16921100 | -0.31883200 | C                     | -7.36154900 | -5.78833000 | -1.55526000 |
| H | 5.53768800  | 0.03026600  | -0.55373900 | H                     | -7.85195000 | -5.70935600 | -2.53651000 |
| H | 7.05127400  | -0.62670100 | -1.20142800 | H                     | -6.28264200 | -5.75848800 | -1.70338500 |
| H | 6.63355200  | -0.87995200 | 0.51011800  | H                     | -7.63484000 | -6.74628100 | -1.10531100 |
| C | 8.64066400  | 0.95332900  | 0.46013300  | C                     | -9.16499200 | -4.62251000 | -0.32591600 |
| H | 9.30920200  | 0.80534700  | -0.40207400 | H                     | -9.31142500 | -3.96749600 | 0.53388200  |
| H | 8.95673700  | 1.84843900  | 0.99745900  | H                     | -9.77642400 | -4.24803400 | -1.16165300 |
| H | 8.75199400  | 0.09923700  | 1.13156300  | H                     | -9.52407000 | -5.61819200 | -0.05652300 |
| C | 7.36154900  | 5.78833000  | -1.55526000 | C                     | -8.64066400 | -0.95332900 | 0.46013300  |
| H | 7.85195000  | 5.70935600  | -2.53651000 | H                     | -9.30920200 | -0.80534700 | -0.40207400 |
| H | 6.28264200  | 5.75848800  | -1.70338500 | H                     | -8.95673700 | -1.84843900 | 0.99745900  |
| H | 7.63484000  | 6.74628100  | -1.10531100 | H                     | -8.75199400 | -0.09923700 | 1.13156300  |
| C | 9.16499200  | 4.62251000  | -0.32591600 | C                     | -6.58172500 | 0.16921100  | -0.31883200 |
| H | 9.31142500  | 3.96749600  | 0.53388200  | H                     | -5.53768800 | -0.03026600 | -0.55373900 |
| H | 9.77642400  | 4.24803400  | -1.16165300 | H                     | -7.05127400 | 0.62670100  | -1.20142800 |
| H | 9.52407000  | 5.61819200  | -0.05652300 | H                     | -6.63355200 | 0.87995200  | 0.51011800  |
| C | -2.46491500 | -2.59909200 | 3.48516600  | <b>8H<sup>+</sup></b> |             |             |             |
| H | -1.46114000 | -2.80943800 | 3.88213900  | Electronic energy =   | -2600.39252 | a.u         |             |
| H | -2.35554300 | -2.16917700 | 2.49088000  | C                     | 1.07672800  | 1.21960900  | -0.14160100 |

|   |             |             |             |   |             |             |             |
|---|-------------|-------------|-------------|---|-------------|-------------|-------------|
| C | 0.78416600  | -0.07944900 | -0.50498800 | H | 0.60241500  | -0.19259700 | -3.15438800 |
| C | 1.86612300  | -0.96248200 | -0.85276200 | H | -0.17982100 | 0.94070500  | -4.24477800 |
| C | 3.23014900  | -0.46792100 | -0.73449200 | H | -4.64451800 | 0.65043400  | -3.75353100 |
| C | 3.47065500  | 0.90458900  | -0.35660100 | C | -5.21779500 | -1.50301300 | 1.64450400  |
| C | 2.38149100  | 1.71806200  | -0.09868500 | C | -5.54954200 | -0.73421800 | 2.80213800  |
| C | 1.65193500  | -2.30531600 | -1.34785000 | C | -6.34819900 | -1.77917300 | 2.44507100  |
| C | 4.30544800  | -1.36913100 | -1.03158300 | N | -4.56981400 | -1.78967300 | 0.58150300  |
| H | 2.54098500  | 2.76873000  | 0.11494000  | N | -5.48410200 | -0.46399500 | -1.56025200 |
| C | 4.06333800  | -2.63206200 | -1.51282300 | C | -6.38913700 | 0.43946400  | -1.64575100 |
| C | 2.74628000  | -3.08262200 | -1.66570800 | C | -6.90322800 | 1.77231200  | -1.71559600 |
| H | 4.88854600  | -3.26583100 | -1.81674900 | C | -7.76975100 | 0.72657100  | -1.59217900 |
| H | 2.58264100  | -4.07414700 | -2.07243500 | N | 4.78142600  | 1.42841800  | -0.36188700 |
| C | -0.65826200 | -0.48273400 | -0.37113700 | C | 5.08441500  | 2.42346400  | 0.42246000  |
| C | -1.70237500 | -0.20649900 | -1.32425200 | C | 6.00726400  | 3.42949800  | 0.73549100  |
| C | -0.97655100 | -1.06337000 | 0.84100600  | C | 4.90157600  | 3.27894200  | 1.53668100  |
| C | -1.44281600 | 0.37368300  | -2.61902800 | N | 5.65190900  | -0.93295000 | -0.87618200 |
| C | -3.07408300 | -0.54919100 | -0.96392100 | C | 6.66067300  | -1.71430200 | -0.53940000 |
| C | -2.27721000 | -1.45234800 | 1.16139600  | C | 7.19389200  | -2.91864800 | -0.07716800 |
| C | -2.51731200 | 0.66071700  | -3.43703900 | C | 8.03323300  | -1.86044900 | -0.38171400 |
| C | -4.15451800 | -0.17756200 | -1.85111800 | N | -6.68697600 | 3.11305400  | -1.72774400 |
| C | -3.33264000 | -1.23282700 | 0.28422700  | N | -9.01180500 | 0.21404300  | -1.41444100 |
| H | -2.47482400 | -1.97509400 | 2.09071900  | N | -5.31956700 | 0.35158000  | 3.58708000  |
| C | -3.83994200 | 0.41692200  | -3.06524500 | N | -7.46633600 | -2.53293800 | 2.57897300  |
| H | -2.32576800 | 1.08667800  | -4.41757700 | N | 7.02695500  | -4.18349100 | 0.31055300  |
| H | -0.18112500 | -1.24595400 | 1.55764500  | N | 9.24571100  | -1.30897100 | -0.45797500 |
| H | 0.25271400  | 1.88192500  | 0.09994700  | N | 4.15841500  | 3.69511200  | 2.57662800  |
| C | 0.29761900  | -2.92683600 | -1.61085200 | N | 7.16220200  | 4.04511900  | 0.41319900  |
| H | -0.26829900 | -3.10132600 | -0.69518600 | C | 7.60879700  | 5.20215200  | 1.18120400  |
| H | -0.33009200 | -2.30688700 | -2.25089900 | H | 7.43654100  | 5.03078400  | 2.24372800  |
| H | 0.43781500  | -3.88759600 | -2.11073300 | H | 8.68112100  | 5.33814400  | 1.02882500  |
| C | -0.06976900 | 0.66665500  | -3.19299200 | H | 7.09722500  | 6.12545000  | 0.87735200  |
| H | 0.44168700  | 1.49158800  | -2.69226800 | C | 7.61053100  | 3.96997100  | -0.97774500 |



|   |             |             |             |                                    |              |             |             |
|---|-------------|-------------|-------------|------------------------------------|--------------|-------------|-------------|
| H | 7.24069900  | 3.04896000  | -1.42738800 | H                                  | -7.10159500  | 0.25542900  | 4.68642800  |
| H | 7.23756800  | 4.81594000  | -1.56899600 | H                                  | -5.65703800  | -0.20042400 | 5.62146700  |
| H | 8.70253800  | 3.97612400  | -1.01260800 | H                                  | -5.96332500  | 1.50111300  | 5.20504300  |
| C | 4.61168200  | 4.82838900  | 3.37671000  | C                                  | -8.23716000  | -2.46767000 | 3.81124400  |
| H | 5.04963000  | 5.58971100  | 2.73162300  | H                                  | -8.38485000  | -1.42787700 | 4.10485300  |
| H | 3.75278000  | 5.26933700  | 3.88562400  | H                                  | -9.21960900  | -2.91285200 | 3.64165300  |
| H | 5.34745700  | 4.53100000  | 4.13628700  | H                                  | -7.75237900  | -3.00405100 | 4.64060400  |
| C | 3.24289400  | 2.76142500  | 3.23676000  | C                                  | -7.48457800  | -3.80924000 | 1.86454300  |
| H | 2.34671200  | 3.29566800  | 3.55971500  | H                                  | -6.91616400  | -3.70995000 | 0.94038600  |
| H | 2.94973700  | 1.97997900  | 2.53929100  | H                                  | -7.04509300  | -4.62011400 | 2.46239000  |
| H | 3.71348200  | 2.30224900  | 4.11595100  | H                                  | -8.51615000  | -4.07640900 | 1.62247300  |
| C | 5.74499700  | -4.64385000 | 0.85657100  | C                                  | -9.17793900  | -1.21011700 | -1.70491600 |
| H | 4.96243800  | -3.92665400 | 0.62142200  | H                                  | -9.42451100  | -1.38562000 | -2.76144600 |
| H | 5.48234600  | -5.60798900 | 0.41610700  | H                                  | -8.25084800  | -1.73273800 | -1.47229200 |
| H | 5.81463600  | -4.75925600 | 1.94402600  | H                                  | -9.98280800  | -1.61605700 | -1.08722300 |
| C | 8.18881700  | -5.02975400 | 0.57681500  | C                                  | -10.17728100 | 1.05811900  | -1.63171300 |
| H | 7.92175600  | -6.06869200 | 0.37649500  | H                                  | -10.04697100 | 2.01400500  | -1.12323900 |
| H | 9.01008900  | -4.75875800 | -0.08527200 | H                                  | -10.36759200 | 1.24774900  | -2.69851500 |
| H | 8.51821400  | -4.95149300 | 1.62006300  | H                                  | -11.05594200 | 0.56803600  | -1.20766300 |
| C | 9.43820800  | -0.08896400 | -1.24276700 | C                                  | -7.81689200  | 4.00385800  | -1.95217200 |
| H | 9.84863800  | -0.31530600 | -2.23309200 | H                                  | -8.13176900  | 4.02704100  | -3.00602300 |
| H | 8.48378600  | 0.42028900  | -1.36869100 | H                                  | -8.66418600  | 3.69345500  | -1.34025300 |
| H | 10.12724400 | 0.57726700  | -0.71924800 | H                                  | -7.53798600  | 5.01654400  | -1.65394600 |
| C | 10.44106800 | -2.06699800 | -0.09606400 | C                                  | -5.38812400  | 3.60370400  | -2.18013500 |
| H | 10.20674500 | -2.77391800 | 0.69862400  | H                                  | -4.61356400  | 2.88548100  | -1.91629900 |
| H | 10.85491700 | -2.60939700 | -0.95444300 | H                                  | -5.36209100  | 3.75571600  | -3.26842200 |
| H | 11.20025000 | -1.37691300 | 0.27633700  | H                                  | -5.17366700  | 4.55808000  | -1.69211800 |
| C | -3.98655000 | 0.94557200  | 3.55833400  | H                                  | 5.71832000   | 0.11204700  | -0.79367600 |
| H | -3.30598700 | 0.46570500  | 4.27687000  | <b>8H<sub>2</sub><sup>2+</sup></b> |              |             |             |
| H | -3.56187500 | 0.84133900  | 2.56092200  | Electronic energy =                | -2600.81550  | a.u         |             |
| H | -4.05924500 | 2.00796700  | 3.80521700  | C                                  | -0.56629500  | 1.48558700  | 0.71775400  |
| C | -6.04500900 | 0.47408100  | 4.84320500  | C                                  | 0.16060200   | 0.73610500  | -0.18596300 |

|   |             |             |             |   |             |             |             |
|---|-------------|-------------|-------------|---|-------------|-------------|-------------|
| C | 1.19841600  | 1.37705000  | -0.95021300 | H | -2.50115900 | 1.00826200  | -3.14403400 |
| C | 1.44581200  | 2.79459400  | -0.72402400 | H | -3.90964100 | -3.26052600 | -3.06255000 |
| C | 0.62970300  | 3.53460600  | 0.21544600  | C | -0.41783100 | -5.52934500 | 1.44196500  |
| C | -0.36268200 | 2.85415100  | 0.90392500  | C | -0.13638000 | -5.60424600 | 2.82331500  |
| C | 1.98091700  | 0.68390700  | -1.94905100 | C | -0.11341000 | -6.74863500 | 2.05688600  |
| C | 2.49231800  | 3.43061600  | -1.47456900 | N | -0.77282700 | -4.92406300 | 0.33745300  |
| H | -1.02183100 | 3.40136000  | 1.56721600  | N | -2.78104500 | -4.80265000 | -1.25791400 |
| C | 3.18748700  | 2.74448300  | -2.44141100 | C | -3.96030200 | -5.37398200 | -1.45638300 |
| C | 2.92991500  | 1.38704300  | -2.66067000 | C | -5.33636500 | -5.33200900 | -1.67400100 |
| H | 3.90964100  | 3.26052600  | -3.06255000 | C | -4.68674300 | -6.55286800 | -1.55430900 |
| H | 3.48977900  | 0.87484200  | -3.43506300 | N | 0.77282700  | 4.92406300  | 0.33745300  |
| C | -0.16060200 | -0.73610500 | -0.18596300 | C | 0.41783100  | 5.52934500  | 1.44196500  |
| C | -1.19841600 | -1.37705000 | -0.95021300 | C | 0.11341000  | 6.74863500  | 2.05688600  |
| C | 0.56629500  | -1.48558700 | 0.71775400  | C | 0.13638000  | 5.60424600  | 2.82331500  |
| C | -1.98091700 | -0.68390700 | -1.94905100 | N | 2.78104500  | 4.80265000  | -1.25791400 |
| C | -1.44581200 | -2.79459400 | -0.72402400 | C | 3.96030200  | 5.37398200  | -1.45638300 |
| C | 0.36268200  | -2.85415100 | 0.90392500  | C | 5.33636500  | 5.33200900  | -1.67400100 |
| C | -2.92991500 | -1.38704300 | -2.66067000 | C | 4.68674300  | 6.55286800  | -1.55430900 |
| C | -2.49231800 | -3.43061600 | -1.47456900 | N | -6.45323600 | -4.64295500 | -1.89904800 |
| C | -0.62970300 | -3.53460600 | 0.21544600  | N | -4.69777500 | -7.88242300 | -1.51696000 |
| H | 1.02183100  | -3.40136000 | 1.56721600  | N | 0.04790700  | -5.00389300 | 4.01041800  |
| C | -3.18748700 | -2.74448300 | -2.44141100 | N | 0.05657300  | -8.07278500 | 1.92247200  |
| H | -3.48977900 | -0.87484200 | -3.43506300 | N | 6.45323600  | 4.64295500  | -1.89904800 |
| H | 1.35019100  | -0.99439200 | 1.28450000  | N | 4.69777500  | 7.88242300  | -1.51696000 |
| H | -1.35019100 | 0.99439200  | 1.28450000  | N | -0.04790700 | 5.00389300  | 4.01041800  |
| C | 1.82032100  | -0.77456700 | -2.32362800 | N | -0.05657300 | 8.07278500  | 1.92247200  |
| H | 2.05067300  | -1.44905600 | -1.49838900 | C | -0.44845700 | 8.89063600  | 3.06707100  |
| H | 0.81058700  | -1.01450500 | -2.65897900 | H | 0.05650000  | 8.53817000  | 3.96592400  |
| H | 2.50115900  | -1.00826200 | -3.14403400 | H | -0.14156600 | 9.92264100  | 2.88844500  |
| C | -1.82032100 | 0.77456700  | -2.32362800 | H | -1.53344000 | 8.87642300  | 3.23167100  |
| H | -2.05067300 | 1.44905600  | -1.49838900 | C | -0.36268200 | 8.60639700  | 0.59439800  |
| H | -0.81058700 | 1.01450500  | -2.65897900 | H | 0.00412500  | 7.91783500  | -0.16599600 |

|   |             |             |             |                     |             |             |             |
|---|-------------|-------------|-------------|---------------------|-------------|-------------|-------------|
| H | -1.44288300 | 8.73333200  | 0.45381900  | H                   | 0.92358200  | -5.15082200 | 5.90066600  |
| H | 0.12018500  | 9.57803000  | 0.46665000  | H                   | -0.41917800 | -6.28412000 | 5.65070900  |
| C | -0.44163900 | 5.80185900  | 5.16941800  | C                   | 0.44845700  | -8.89063600 | 3.06707100  |
| H | -1.16098900 | 6.56345200  | 4.87029900  | H                   | -0.05650000 | -8.53817000 | 3.96592400  |
| H | -0.92358200 | 5.15082200  | 5.90066600  | H                   | 0.14156600  | -9.92264100 | 2.88844500  |
| H | 0.41917800  | 6.28412000  | 5.65070900  | H                   | 1.53344000  | -8.87642300 | 3.23167100  |
| C | 0.62525000  | 3.73484800  | 4.29564300  | C                   | 0.36268200  | -8.60639700 | 0.59439800  |
| H | -0.02585200 | 3.10583200  | 4.90664600  | H                   | -0.00412500 | -7.91783500 | -0.16599600 |
| H | 0.83934900  | 3.21572300  | 3.36372100  | H                   | 1.44288300  | -8.73333200 | 0.45381900  |
| H | 1.56379600  | 3.89986600  | 4.83989800  | H                   | -0.12018500 | -9.57803000 | 0.46665000  |
| C | 6.57523600  | 3.23941100  | -1.48940400 | C                   | -3.44299200 | -8.62793200 | -1.63191500 |
| H | 5.59619100  | 2.83994500  | -1.23649600 | H                   | -3.32534600 | -9.04478600 | -2.63767100 |
| H | 6.99730200  | 2.65072200  | -2.30675300 | H                   | -2.60270700 | -7.96600700 | -1.42770700 |
| H | 7.23405200  | 3.15596600  | -0.61823200 | H                   | -3.43501200 | -9.44578400 | -0.90815300 |
| C | 7.70162400  | 5.33818100  | -2.21635100 | C                   | -5.94032300 | -8.63821500 | -1.67376400 |
| H | 8.30907300  | 4.69702300  | -2.85709200 | H                   | -6.78111800 | -8.05373700 | -1.30392500 |
| H | 7.49166700  | 6.25720400  | -2.76121400 | H                   | -6.11721300 | -8.91050900 | -2.72023600 |
| H | 8.27592600  | 5.56986300  | -1.31191700 | H                   | -5.87655300 | -9.55363600 | -1.08294500 |
| C | 3.44299200  | 8.62793200  | -1.63191500 | C                   | -7.70162400 | -5.33818100 | -2.21635100 |
| H | 3.32534600  | 9.04478600  | -2.63767100 | H                   | -8.30907300 | -4.69702300 | -2.85709200 |
| H | 2.60270700  | 7.96600700  | -1.42770700 | H                   | -7.49166700 | -6.25720400 | -2.76121400 |
| H | 3.43501200  | 9.44578400  | -0.90815300 | H                   | -8.27592600 | -5.56986300 | -1.31191700 |
| C | 5.94032300  | 8.63821500  | -1.67376400 | C                   | -6.57523600 | -3.23941100 | -1.48940400 |
| H | 6.78111800  | 8.05373700  | -1.30392500 | H                   | -5.59619100 | -2.83994500 | -1.23649600 |
| H | 6.11721300  | 8.91050900  | -2.72023600 | H                   | -6.99730200 | -2.65072200 | -2.30675300 |
| H | 5.87655300  | 9.55363600  | -1.08294500 | H                   | -7.23405200 | -3.15596600 | -0.61823200 |
| C | -0.62525000 | -3.73484800 | 4.29564300  | H                   | -2.02686500 | -5.28188300 | -0.70875700 |
| H | 0.02585200  | -3.10583200 | 4.90664600  | H                   | 2.02686500  | 5.28188300  | -0.70875700 |
| H | -0.83934900 | -3.21572300 | 3.36372100  | <b>9</b>            |             |             |             |
| H | -1.56379600 | -3.89986600 | 4.83989800  | Electronic energy = | -3219.44029 | a.u         |             |
| C | 0.44163900  | -5.80185900 | 5.16941800  | C                   | -1.32376300 | 0.93175100  | -0.29182900 |
| H | 1.16098900  | -6.56345200 | 4.87029900  | C                   | -0.26247900 | 0.70541000  | -1.14494600 |

|   |             |             |             |   |             |             |             |
|---|-------------|-------------|-------------|---|-------------|-------------|-------------|
| C | 0.33622600  | 1.82078300  | -1.83197800 | H | -2.57416000 | -0.50836800 | -4.16135300 |
| C | -0.16305000 | 3.16349200  | -1.55165100 | H | -2.04244700 | -4.93592300 | -3.46856400 |
| C | -1.32376300 | 3.32307300  | -0.70873800 | C | 2.07252200  | -5.11461900 | 0.56191000  |
| C | -1.86864400 | 2.20339200  | -0.09842300 | C | 1.71045600  | -5.31130500 | 1.93270900  |
| C | 1.39575100  | 1.65657100  | -2.79974800 | C | 2.57938100  | -6.17886900 | 1.34508200  |
| C | 0.52949300  | 4.30475800  | -2.10745900 | N | 2.00030700  | -4.54199400 | -0.57415400 |
| H | -2.75375400 | 2.32933700  | 0.51641400  | N | -0.15730300 | -5.61781600 | -1.80134600 |
| C | 1.56105900  | 4.08144200  | -3.00504200 | C | -1.06247000 | -6.46607500 | -1.48297900 |
| C | 1.95667700  | 2.78736400  | -3.35636800 | C | -2.37652300 | -6.87830300 | -1.08528200 |
| H | 2.04244700  | 4.93592300  | -3.46856400 | C | -1.38152900 | -7.80640000 | -1.16915300 |
| H | 2.73813100  | 2.66771400  | -4.10159500 | N | -2.00030700 | 4.54199400  | -0.57415400 |
| C | 0.26247900  | -0.70541000 | -1.14494600 | C | -2.07252200 | 5.11461900  | 0.56191000  |
| C | -0.33622600 | -1.82078300 | -1.83197800 | C | -2.57938100 | 6.17886900  | 1.34508200  |
| C | 1.32376300  | -0.93175100 | -0.29182900 | C | -1.71045600 | 5.31130500  | 1.93270900  |
| C | -1.39575100 | -1.65657100 | -2.79974800 | N | 0.15730300  | 5.61781600  | -1.80134600 |
| C | 0.16305000  | -3.16349200 | -1.55165100 | C | 1.06247000  | 6.46607500  | -1.48297900 |
| C | 1.86864400  | -2.20339200 | -0.09842300 | C | 2.37652300  | 6.87830300  | -1.08528200 |
| C | -1.95667700 | -2.78736400 | -3.35636800 | C | 1.38152900  | 7.80640000  | -1.16915300 |
| C | -0.52949300 | -4.30475800 | -2.10745900 | C | 4.24378000  | 5.25470700  | -0.82584500 |
| C | 1.32376300  | -3.32307300 | -0.70873800 | C | 4.61219200  | 7.62472200  | -0.34323600 |
| H | 2.75375400  | -2.32933700 | 0.51641400  | C | 5.50145900  | 5.40942700  | 0.03625900  |
| C | -1.56105900 | -4.08144200 | -3.00504200 | H | 4.49890200  | 4.95490700  | -1.84914400 |
| H | -2.73813100 | -2.66771400 | -4.10159500 | H | 3.53180000  | 4.52414300  | -0.43818000 |
| H | 1.75935600  | -0.08408700 | 0.22814900  | C | 5.94023600  | 6.85915800  | -0.23764800 |
| H | -1.75935600 | 0.08408700  | 0.22814900  | H | 4.30190500  | 8.03095000  | 0.63058000  |
| C | 1.92073300  | 0.32657100  | -3.30392500 | H | 4.66773900  | 8.46146300  | -1.04898800 |
| H | 2.49830600  | -0.21801600 | -2.55466800 | H | 5.24845900  | 5.28523300  | 1.09390800  |
| H | 1.12833600  | -0.34666500 | -3.63384200 | H | 6.27070300  | 4.67657400  | -0.21355300 |
| H | 2.57416000  | 0.50836800  | -4.16135300 | H | 6.59266400  | 7.26566500  | 0.53746800  |
| C | -1.92073300 | -0.32657100 | -3.30392500 | H | 6.47822500  | 6.91313000  | -1.18883600 |
| H | -2.49830600 | 0.21801600  | -2.55466800 | N | 3.66477600  | 6.60701400  | -0.80404900 |
| H | -1.12833600 | 0.34666500  | -3.63384200 | C | -4.24378000 | -5.25470700 | -0.82584500 |

|   |             |             |             |   |             |             |             |
|---|-------------|-------------|-------------|---|-------------|-------------|-------------|
| C | -4.61219200 | -7.62472200 | -0.34323600 | H | 0.39171000  | -2.98132100 | 2.48833300  |
| C | -5.50145900 | -5.40942700 | 0.03625900  | H | -1.05649500 | -5.63261400 | 4.90798800  |
| H | -4.49890200 | -4.95490700 | -1.84914400 | H | 0.05212300  | -5.05616100 | 6.15415800  |
| H | -3.53180000 | -4.52414300 | -0.43818000 | H | -1.27230700 | -3.21346600 | 4.65819700  |
| C | -5.94023600 | -6.85915800 | -0.23764800 | H | 0.46098400  | -2.97469500 | 4.91502500  |
| H | -4.30190500 | -8.03095000 | 0.63058000  | N | 1.01707100  | -4.92968900 | 3.02275100  |
| H | -4.66773900 | -8.46146300 | -1.04898800 | C | -4.30975700 | 7.62905400  | 0.35806100  |
| H | -5.24845900 | -5.28523300 | 1.09390800  | C | -3.61781900 | 7.99671500  | 2.66981400  |
| H | -6.27070300 | -4.67657400 | -0.21355300 | C | -4.82053300 | 8.99919500  | 0.81045300  |
| H | -6.59266400 | -7.26566500 | 0.53746800  | H | -5.13072900 | 6.89955400  | 0.30682300  |
| H | -6.47822500 | -6.91313000 | -1.18883600 | H | -3.81209500 | 7.63983900  | -0.61333400 |
| N | -3.66477600 | -6.60701400 | -0.80404900 | C | -4.84439600 | 8.87078900  | 2.34527400  |
| C | -1.02055800 | 5.68046000  | 4.28066500  | H | -2.74707400 | 8.60194900  | 2.95548100  |
| C | -0.00478900 | 3.86564700  | 2.99655200  | H | -3.81835000 | 7.29893200  | 3.49217000  |
| C | 0.13968000  | 5.06048200  | 5.07945300  | H | -4.11736000 | 9.77987100  | 0.50435800  |
| H | -1.98221300 | 5.55780700  | 4.79808700  | H | -5.79820200 | 9.24173700  | 0.39000900  |
| H | -0.87467700 | 6.75287600  | 4.10373300  | H | -4.81451700 | 9.83461600  | 2.85690600  |
| C | 0.28623100  | 3.64797500  | 4.48390700  | H | -5.75854000 | 8.35831000  | 2.65897000  |
| H | 0.89671000  | 4.19337600  | 2.45972600  | N | -3.35454100 | 7.28260500  | 1.41726000  |
| H | -0.39171000 | 2.98132100  | 2.48833300  | C | 4.30975700  | -7.62905400 | 0.35806100  |
| H | 1.05649500  | 5.63261400  | 4.90798800  | C | 3.61781900  | -7.99671500 | 2.66981400  |
| H | -0.05212300 | 5.05616100  | 6.15415800  | C | 4.82053300  | -8.99919500 | 0.81045300  |
| H | 1.27230700  | 3.21346600  | 4.65819700  | H | 5.13072900  | -6.89955400 | 0.30682300  |
| H | -0.46098400 | 2.97469500  | 4.91502500  | H | 3.81209500  | -7.63983900 | -0.61333400 |
| N | -1.01707100 | 4.92968900  | 3.02275100  | C | 4.84439600  | -8.87078900 | 2.34527400  |
| C | 1.02055800  | -5.68046000 | 4.28066500  | H | 2.74707400  | -8.60194900 | 2.95548100  |
| C | 0.00478900  | -3.86564700 | 2.99655200  | H | 3.81835000  | -7.29893200 | 3.49217000  |
| C | -0.13968000 | -5.06048200 | 5.07945300  | H | 4.11736000  | -9.77987100 | 0.50435800  |
| H | 1.98221300  | -5.55780700 | 4.79808700  | H | 5.79820200  | -9.24173700 | 0.39000900  |
| H | 0.87467700  | -6.75287600 | 4.10373300  | H | 4.81451700  | -9.83461600 | 2.85690600  |
| C | -0.28623100 | -3.64797500 | 4.48390700  | H | 5.75854000  | -8.35831000 | 2.65897000  |
| H | -0.89671000 | -4.19337600 | 2.45972600  | N | 3.35454100  | -7.28260500 | 1.41726000  |

|                                     |             |              |             |   |             |             |             |
|-------------------------------------|-------------|--------------|-------------|---|-------------|-------------|-------------|
| C                                   | 1.85991400  | 10.20590400  | -0.77503900 | C | 3.30788700  | 1.43638600  | -0.16517700 |
| C                                   | -0.38084100 | 9.50883300   | -1.46713400 | C | 2.24843100  | 1.77535200  | 0.67050600  |
| C                                   | 0.91728100  | 11.41868100  | -0.77379200 | C | 1.43516400  | -0.53881600 | -2.83453300 |
| H                                   | 2.62610500  | 10.29505500  | -1.55973600 | C | 4.14908000  | -0.00731900 | -2.05238900 |
| H                                   | 2.37774400  | 10.07540300  | 0.18156000  | H | 2.43654500  | 2.44559100  | 1.50236800  |
| C                                   | -0.19817400 | 11.00526400  | -1.75024600 | C | 3.83996800  | -0.71548100 | -3.20726200 |
| H                                   | -1.10700700 | 9.33931500   | -0.66176500 | C | 2.51753700  | -0.94157400 | -3.59189200 |
| H                                   | -0.71043700 | 8.93932500   | -2.33823200 | H | 4.64903200  | -1.07056200 | -3.83549900 |
| H                                   | 0.50377400  | 11.56840300  | 0.22831400  | H | 2.33265200  | -1.46258300 | -4.52718100 |
| H                                   | 1.42534100  | 12.33931500  | -1.06658100 | C | -0.80188200 | 0.17071000  | -0.80200200 |
| H                                   | -1.11966500 | 11.57378900  | -1.61071700 | C | -1.88723400 | 1.01676800  | -1.22296500 |
| H                                   | 0.13374300  | 11.15258800  | -2.78252400 | C | -1.09244100 | -1.08912000 | -0.31775700 |
| N                                   | 0.96330700  | 9.08218700   | -1.04800700 | C | -1.67465000 | 2.29583300  | -1.86526400 |
| C                                   | -1.85991400 | -10.20590400 | -0.77503900 | C | -3.25127400 | 0.54618400  | -1.02922300 |
| C                                   | 0.38084100  | -9.50883300  | -1.46713400 | C | -2.39773000 | -1.57323800 | -0.20525900 |
| C                                   | -0.91728100 | -11.41868100 | -0.77379200 | C | -2.77074800 | 3.04354100  | -2.24126400 |
| H                                   | -2.62610500 | -10.29505500 | -1.55973600 | C | -4.32818600 | 1.41931100  | -1.39873300 |
| H                                   | -2.37774400 | -10.07540300 | 0.18156000  | C | -3.49049100 | -0.77965900 | -0.50987600 |
| C                                   | 0.19817400  | -11.00526400 | -1.75024600 | H | -2.55960400 | -2.59826300 | 0.10811500  |
| H                                   | 1.10700700  | -9.33931500  | -0.66176500 | C | -4.08658600 | 2.62313800  | -2.01173400 |
| H                                   | 0.71043700  | -8.93932500  | -2.33823200 | H | -2.60972500 | 3.98304100  | -2.75837000 |
| H                                   | -0.50377400 | -11.56840300 | 0.22831400  | H | -0.26580200 | -1.72859800 | -0.02724900 |
| H                                   | -1.42534100 | -12.33931500 | -1.06658100 | H | 0.15199400  | 1.61202400  | 1.08976500  |
| H                                   | 1.11966500  | -11.57378900 | -1.61071700 | C | 0.06434400  | -0.85974200 | -3.39878300 |
| H                                   | -0.13374300 | -11.15258800 | -2.78252400 | H | -0.46568500 | -1.63232300 | -2.83665500 |
| N                                   | -0.96330700 | -9.08218700  | -1.04800700 | H | -0.59684700 | 0.00781300  | -3.44106200 |
| <b>9H<sup>+</sup></b>               |             |              |             | H | 0.18216200  | -1.22415300 | -4.42222000 |
| Electronic energy = -3219.92284 a.u |             |              |             | C | -0.32159300 | 2.86988900  | -2.22650300 |
| C                                   | 0.95162100  | 1.33173800   | 0.40998900  | H | 0.26158500  | 3.15190900  | -1.34928900 |
| C                                   | 0.63834600  | 0.58934900   | -0.71288900 | H | 0.29177400  | 2.16994500  | -2.79392900 |
| C                                   | 1.68793400  | 0.18349400   | -1.61153500 | H | -0.46540900 | 3.76195300  | -2.84021500 |
| C                                   | 3.05909900  | 0.54475700   | -1.27599500 | H | -4.91349900 | 3.22635700  | -2.36571500 |

|   |             |             |             |   |             |             |             |
|---|-------------|-------------|-------------|---|-------------|-------------|-------------|
| C | -5.08485600 | -2.20412500 | 0.46053200  | H | -5.44045000 | 5.39440200  | -1.34674800 |
| C | -4.87535300 | -2.92842700 | 1.65983700  | H | -5.08876600 | 4.51091900  | 0.14545900  |
| C | -5.98492800 | -3.18773300 | 0.88891500  | C | -7.66872000 | 6.65577400  | -0.06954100 |
| N | -4.80092000 | -1.29225500 | -0.42856600 | H | -8.75133000 | 4.93230000  | 0.73373200  |
| N | -5.67188000 | 1.00974400  | -1.17360800 | H | -9.01968100 | 5.18722200  | -1.00337800 |
| C | -6.68164600 | 1.82533100  | -0.93017000 | H | -6.23949500 | 6.17010100  | 1.49681900  |
| C | -7.22287700 | 3.08593800  | -0.66883500 | H | -5.55931000 | 7.21649300  | 0.24608400  |
| C | -8.04647600 | 1.97421000  | -0.71864400 | H | -8.24260000 | 7.28838300  | 0.60836400  |
| N | 4.52779000  | 2.07579100  | 0.00398100  | H | -7.64411000 | 7.14772700  | -1.04572500 |
| C | 5.16537700  | 2.04051700  | 1.11131200  | N | -7.11098900 | 4.39740100  | -0.49688000 |
| C | 6.26039800  | 2.51067800  | 1.87117100  | C | 6.09750200  | 0.56017200  | 4.59513600  |
| C | 5.48164500  | 1.52544300  | 2.40336400  | C | 4.26699100  | -0.42452000 | 3.31228600  |
| N | 5.47324100  | 0.18893800  | -1.68211500 | C | 5.66020300  | -0.76634600 | 5.24187800  |
| C | 6.31993400  | -0.77328500 | -1.79702800 | H | 5.95904100  | 1.41147300  | 5.27388800  |
| C | 6.72784600  | -2.13422800 | -1.95633800 | H | 7.15169600  | 0.54327800  | 4.29464400  |
| C | 7.66725800  | -1.17584800 | -1.69879300 | C | 4.21767400  | -0.96805400 | 4.74254600  |
| C | 5.10886600  | -3.98305600 | -2.34731500 | H | 4.63810800  | -1.18621700 | 2.61151000  |
| C | 7.49434700  | -4.47650900 | -2.12323000 | H | 3.30436400  | -0.06950600 | 2.94128100  |
| C | 5.29203700  | -5.46469400 | -2.00001000 | H | 6.29421300  | -1.58207500 | 4.88236700  |
| H | 4.77190100  | -3.86052200 | -3.38361600 | H | 5.73797400  | -0.74241900 | 6.33018300  |
| H | 4.39606400  | -3.46384000 | -1.70434700 | H | 3.89752400  | -2.01087700 | 4.78301600  |
| C | 6.72676200  | -5.76099300 | -2.47142500 | H | 3.52084200  | -0.37551000 | 5.34318800  |
| H | 7.93926200  | -4.53184500 | -1.11976700 | N | 5.21520300  | 0.69138200  | 3.42851200  |
| H | 8.30014100  | -4.26556500 | -2.83443000 | C | -4.54459200 | -4.28749100 | 3.69061400  |
| H | 5.21281300  | -5.60837900 | -0.91786400 | C | -3.07650700 | -2.36971900 | 3.28429900  |
| H | 4.54622100  | -6.10087900 | -2.47986800 | C | -3.65485400 | -4.03515400 | 4.91955900  |
| H | 7.16157900  | -6.64338700 | -1.99885400 | H | -4.35303700 | -5.26951700 | 3.24256600  |
| H | 6.73953200  | -5.92232400 | -3.55335000 | H | -5.61041600 | -4.22707500 | 3.93254800  |
| N | 6.46186500  | -3.43486500 | -2.16955600 | C | -2.44889200 | -3.26408500 | 4.35457800  |
| C | -5.83071900 | 5.13033300  | -0.35942000 | H | -3.49719500 | -1.45776100 | 3.72820600  |
| C | -8.27907700 | 5.25416800  | -0.20222400 | H | -2.38665400 | -2.07715800 | 2.49490800  |
| C | -6.23824900 | 6.38189500  | 0.42367800  | H | -4.18791200 | -3.41452300 | 5.64526400  |

|   |             |             |             |                                     |              |             |             |
|---|-------------|-------------|-------------|-------------------------------------|--------------|-------------|-------------|
| H | -3.37395100 | -4.96255000 | 5.42010900  | C                                   | 11.29029000  | -0.91580900 | -1.24771100 |
| H | -1.91802300 | -2.69001400 | 5.11510500  | H                                   | 10.14135700  | -2.18629700 | -2.61173900 |
| H | -1.73648000 | -3.95365400 | 3.89258300  | H                                   | 9.93827700   | -2.61905700 | -0.90441500 |
| N | -4.15634600 | -3.22242800 | 2.74684500  | C                                   | 10.88195000  | 0.49053000  | -1.72124700 |
| C | 7.58450800  | 4.38481400  | 0.96260100  | H                                   | 9.23213100   | 0.93288300  | -0.35253200 |
| C | 8.15436500  | 3.46544200  | 3.15840400  | H                                   | 8.81859200   | 1.20302800  | -2.05134900 |
| C | 8.97145900  | 4.88814300  | 1.37395100  | H                                   | 11.45381900  | -0.91666400 | -0.16582100 |
| H | 6.83895400  | 5.18945200  | 1.01505800  | H                                   | 12.20232000  | -1.28014700 | -1.72324600 |
| H | 7.55017800  | 3.96134100  | -0.04289800 | H                                   | 11.46183000  | 1.28441100  | -1.24720200 |
| C | 8.95228900  | 4.75656800  | 2.90789400  | H                                   | 11.01825100  | 0.57662300  | -2.80340300 |
| H | 8.81362800  | 2.59153600  | 3.25126700  | N                                   | 8.95058800   | -0.83567900 | -1.49032700 |
| H | 7.54861500  | 3.52298800  | 4.06964700  | C                                   | -10.48092300 | 2.19831900  | -0.33471700 |
| H | 9.74590500  | 4.24330000  | 0.94748400  | C                                   | -9.53028800  | 0.00997000  | -0.92485100 |
| H | 9.16160600  | 5.90868900  | 1.03763800  | C                                   | -11.54664100 | 1.10546400  | -0.17875000 |
| H | 9.95006000  | 4.71959000  | 3.34827400  | H                                   | -10.71768200 | 2.87599600  | -1.16333600 |
| H | 8.42651600  | 5.60920000  | 3.34741900  | H                                   | -10.34949800 | 2.79483300  | 0.57156500  |
| N | 7.30827400  | 3.34722600  | 1.96674800  | C                                   | -11.05249800 | -0.01759200 | -1.10695300 |
| C | -7.78428300 | -3.88331500 | -0.64384600 | H                                   | -9.21425600  | -0.61162300 | -0.07909500 |
| C | -7.55692700 | -4.99694600 | 1.52497100  | H                                   | -8.98636800  | -0.31089700 | -1.81546200 |
| C | -9.04159800 | -4.71261800 | -0.37166700 | H                                   | -11.57456600 | 0.75619300  | 0.85717500  |
| H | -7.15845800 | -4.35022600 | -1.41461200 | H                                   | -12.54320300 | 1.46432700  | -0.43738900 |
| H | -7.99440400 | -2.85867400 | -0.95719500 | H                                   | -11.48047900 | -0.99024300 | -0.86173800 |
| C | -8.55291600 | -5.76476000 | 0.63960100  | H                                   | -11.30825600 | 0.20918600  | -2.14562400 |
| H | -8.03530300 | -4.59692800 | 2.42678300  | N                                   | -9.25650100  | 1.43255600  | -0.63714800 |
| H | -6.71597500 | -5.62300000 | 1.83758900  | H                                   | -5.73892400  | -0.01747900 | -0.96298500 |
| H | -9.81639400 | -4.08500900 | 0.07928100  | <b>9H<sub>2</sub><sup>2+</sup></b>  |              |             |             |
| H | -9.45224000 | -5.15590200 | -1.27978400 | Electronic energy = -3220.35633 a.u |              |             |             |
| H | -9.36281600 | -6.20901800 | 1.21939300  | C                                   | -0.82690100  | 1.36679300  | 0.48840300  |
| H | -8.03763900 | -6.57369600 | 0.11463100  | C                                   | 0.02942800   | 0.75263700  | -0.40423500 |
| N | -7.10034600 | -3.89324700 | 0.66092200  | C                                   | 0.94724300   | 1.56338900  | -1.16088900 |
| C | 10.06825100 | -1.77810200 | -1.59348300 | C                                   | 0.94410700   | 3.00320600  | -0.93648100 |
| C | 9.38952700  | 0.56494800  | -1.37401200 | C                                   | 0.00038000   | 3.59275400  | -0.00920600 |



|   |             |             |             |   |             |             |             |
|---|-------------|-------------|-------------|---|-------------|-------------|-------------|
| C | -0.86667300 | 2.74945300  | 0.67015400  | C | 0.86933600  | -5.56058000 | 2.58237500  |
| C | 1.84610300  | 1.01519200  | -2.15219100 | C | 1.14491100  | -6.65879200 | 1.79379600  |
| C | 1.87539800  | 3.80972700  | -1.67642200 | N | 0.10753600  | -4.98291500 | 0.10502600  |
| H | -1.62002600 | 3.17737300  | 1.32067700  | N | -1.91846800 | -5.20971500 | -1.45977400 |
| C | 2.69548400  | 3.25031200  | -2.62572000 | C | -2.96749600 | -5.99240000 | -1.67220500 |
| C | 2.67399200  | 1.86982500  | -2.84822100 | C | -4.31213200 | -6.21777400 | -1.96757100 |
| H | 3.32886300  | 3.88199700  | -3.23444400 | C | -3.46863900 | -7.28634200 | -1.69907500 |
| H | 3.32270900  | 1.45988500  | -3.61432200 | N | -0.10753600 | 4.98291500  | 0.10502600  |
| C | -0.02942800 | -0.75263700 | -0.40423500 | C | -0.58434100 | 5.52378400  | 1.19968700  |
| C | -0.94724300 | -1.56338900 | -1.16088900 | C | -1.14491100 | 6.65879200  | 1.79379600  |
| C | 0.82690100  | -1.36679300 | 0.48840300  | C | -0.86933600 | 5.56058000  | 2.58237500  |
| C | -1.84610300 | -1.01519200 | -2.15219100 | N | 1.91846800  | 5.20971500  | -1.45977400 |
| C | -0.94410700 | -3.00320600 | -0.93648100 | C | 2.96749600  | 5.99240000  | -1.67220500 |
| C | 0.86667300  | -2.74945300 | 0.67015400  | C | 4.31213200  | 6.21777400  | -1.96757100 |
| C | -2.67399200 | -1.86982500 | -2.84822100 | C | 3.46863900  | 7.28634200  | -1.69907500 |
| C | -1.87539800 | -3.80972700 | -1.67642200 | C | 5.98081100  | 4.39567000  | -2.30161400 |
| C | -0.00038000 | -3.59275400 | -0.00920600 | C | 6.65652300  | 6.75131600  | -2.47849800 |
| H | 1.62002600  | -3.17737300 | 1.32067700  | C | 7.49577900  | 4.51646200  | -2.11296300 |
| C | -2.69548400 | -3.25031200 | -2.62572000 | H | 5.74151900  | 3.93809000  | -3.26653700 |
| H | -3.32270900 | -1.45988500 | -3.61432200 | H | 5.47968700  | 3.82625600  | -1.51777900 |
| H | 1.52022100  | -0.74639500 | 1.04684400  | C | 7.83623700  | 5.83478800  | -2.82798700 |
| H | -1.52022100 | 0.74639500  | 1.04684400  | H | 6.84022500  | 7.30637900  | -1.55137200 |
| C | 1.93178600  | -0.44712900 | -2.53694000 | H | 6.42538700  | 7.46696400  | -3.27118800 |
| H | 2.27263900  | -1.08022000 | -1.71719300 | H | 7.73801200  | 4.58624400  | -1.04862600 |
| H | 0.97545100  | -0.84927700 | -2.87321300 | H | 8.03035600  | 3.65966700  | -2.52417500 |
| H | 2.64066000  | -0.55735100 | -3.35982700 | H | 8.78957800  | 6.25911200  | -2.51239100 |
| C | -1.93178600 | 0.44712900  | -2.53694000 | H | 7.88184100  | 5.67779100  | -3.90895800 |
| H | -2.27263900 | 1.08022000  | -1.71719300 | N | 5.53263900  | 5.80720000  | -2.28348100 |
| H | -0.97545100 | 0.84927700  | -2.87321300 | C | -5.98081100 | -4.39567000 | -2.30161400 |
| H | -2.64066000 | 0.55735100  | -3.35982700 | C | -6.65652300 | -6.75131600 | -2.47849800 |
| H | -3.32886300 | -3.88199700 | -3.23444400 | C | -7.49577900 | -4.51646200 | -2.11296300 |
| C | 0.58434100  | -5.52378400 | 1.19968700  | H | -5.74151900 | -3.93809000 | -3.26653700 |

|   |             |             |             |   |             |              |             |
|---|-------------|-------------|-------------|---|-------------|--------------|-------------|
| H | -5.47968700 | -3.82625600 | -1.51777900 | H | 0.03065200  | -2.85497600  | 6.14525300  |
| C | -7.83623700 | -5.83478800 | -2.82798700 | H | 1.66784900  | -2.92437900  | 5.48186800  |
| H | -6.84022500 | -7.30637900 | -1.55137200 | N | 0.90428400  | -5.00197200  | 3.79358500  |
| H | -6.42538700 | -7.46696400 | -3.27118800 | C | -1.90928400 | 8.51023600   | 0.35521200  |
| H | -7.73801200 | -4.58624400 | -1.04862600 | C | -2.22913700 | 8.65744500   | 2.78227200  |
| H | -8.03035600 | -3.65966700 | -2.52417500 | C | -2.32101500 | 9.93708000   | 0.72840100  |
| H | -8.78957800 | -6.25911200 | -2.51239100 | H | -2.72246800 | 7.98059300   | -0.15526300 |
| H | -7.88184100 | -5.67779100 | -3.90895800 | H | -1.02373300 | 8.46327100   | -0.28179000 |
| N | -5.53263900 | -5.80720000 | -2.28348100 | C | -3.04101700 | 9.75376400   | 2.07591300  |
| C | -1.44872400 | 5.69940000  | 4.97675700  | H | -1.43814800 | 9.07877800   | 3.41336200  |
| C | -0.17708400 | 3.76923700  | 4.16018000  | H | -2.85528700 | 8.01257300   | 3.40456200  |
| C | -0.94410700 | 4.86111600  | 6.16177500  | H | -1.43394100 | 10.56479600  | 0.85590600  |
| H | -2.54331500 | 5.71682200  | 4.92672000  | H | -2.95325300 | 10.39813500  | -0.03119300 |
| H | -1.09265800 | 6.73274000  | 5.01816900  | H | -3.09090800 | 10.67192000  | 2.66199600  |
| C | -0.71930400 | 3.46399800  | 5.55809900  | H | -4.06527600 | 9.40992900   | 1.90822600  |
| H | 0.90352300  | 3.96017100  | 4.18815700  | N | -1.63492700 | 7.89362800   | 1.66746700  |
| H | -0.36566300 | 2.98060200  | 3.43338400  | C | 1.90928400  | -8.51023600  | 0.35521200  |
| H | 0.00242400  | 5.26605300  | 6.53031200  | C | 2.22913700  | -8.65744500  | 2.78227200  |
| H | -1.64963000 | 4.85961300  | 6.99319900  | C | 2.32101500  | -9.93708000  | 0.72840100  |
| H | -0.03065200 | 2.85497600  | 6.14525300  | H | 2.72246800  | -7.98059300  | -0.15526300 |
| H | -1.66784900 | 2.92437900  | 5.48186800  | H | 1.02373300  | -8.46327100  | -0.28179000 |
| N | -0.90428400 | 5.00197200  | 3.79358500  | C | 3.04101700  | -9.75376400  | 2.07591300  |
| C | 1.44872400  | -5.69940000 | 4.97675700  | H | 1.43814800  | -9.07877800  | 3.41336200  |
| C | 0.17708400  | -3.76923700 | 4.16018000  | H | 2.85528700  | -8.01257300  | 3.40456200  |
| C | 0.94410700  | -4.86111600 | 6.16177500  | H | 1.43394100  | -10.56479600 | 0.85590600  |
| H | 2.54331500  | -5.71682200 | 4.92672000  | H | 2.95325300  | -10.39813500 | -0.03119300 |
| H | 1.09265800  | -6.73274000 | 5.01816900  | H | 3.09090800  | -10.67192000 | 2.66199600  |
| C | 0.71930400  | -3.46399800 | 5.55809900  | H | 4.06527600  | -9.40992900  | 1.90822600  |
| H | -0.90352300 | -3.96017100 | 4.18815700  | N | 1.63492700  | -7.89362800  | 1.66746700  |
| H | 0.36566300  | -2.98060200 | 3.43338400  | C | 4.34520900  | 9.59994300   | -1.72869500 |
| H | -0.00242400 | -5.26605300 | 6.53031200  | C | 1.95218100  | 9.20091100   | -1.32737200 |
| H | 1.64963000  | -4.85961300 | 6.99319900  | C | 3.66258300  | 10.90293000  | -1.29464400 |

|                                   |             |              |             |    |             |             |             |
|-----------------------------------|-------------|--------------|-------------|----|-------------|-------------|-------------|
| H                                 | 4.66756200  | 9.64362900   | -2.77512200 | C  | -4.56638000 | 0.83269500  | 0.65277200  |
| H                                 | 5.20910200  | 9.34561500   | -1.11022200 | C  | -5.09813900 | -0.28716900 | 1.22834100  |
| C                                 | 2.18573200  | 10.67875800  | -1.66327500 | H  | -4.98030300 | -2.40809800 | 1.41048600  |
| H                                 | 1.66541100  | 9.06670500   | -0.27814500 | C  | -1.15342700 | -0.35436200 | -0.36438800 |
| H                                 | 1.19610300  | 8.73165800   | -1.96000600 | C  | -2.77540300 | 1.92994300  | -0.61846500 |
| H                                 | 3.76845100  | 11.03927400  | -0.21486800 | H  | -5.09728400 | 1.77788500  | 0.67255500  |
| H                                 | 4.09548500  | 11.77501400  | -1.78498800 | H  | -6.05188600 | -0.24971000 | 1.74173900  |
| H                                 | 1.50799000  | 11.33792800  | -1.12001400 | C  | -1.53065100 | 1.90728700  | -1.19160800 |
| H                                 | 2.03235500  | 10.84715400  | -2.73260000 | C  | -0.70546300 | 0.77825400  | -1.02351700 |
| N                                 | 3.27697600  | 8.59105500   | -1.56940500 | H  | -3.38605000 | 2.82533800  | -0.64879300 |
| C                                 | -4.34520900 | -9.59994300  | -1.72869500 | H  | -1.14450300 | 2.78006000  | -1.70617200 |
| C                                 | -1.95218100 | -9.20091100  | -1.32737200 | H  | 0.32506400  | 0.83046500  | -1.34993500 |
| C                                 | -3.66258300 | -10.90293000 | -1.29464400 | N  | -0.27007000 | -1.39141200 | 0.02038000  |
| H                                 | -4.66756200 | -9.64362900  | -2.77512200 | N  | -2.75093300 | -2.98412000 | 0.05660200  |
| H                                 | -5.20910200 | -9.34561500  | -1.11022200 | C  | 0.03825900  | -1.34544300 | 1.46024100  |
| C                                 | -2.18573200 | -10.67875800 | -1.66327500 | H  | 0.58787800  | -2.24332400 | 1.73676500  |
| H                                 | -1.66541100 | -9.06670500  | -0.27814500 | H  | 0.63791900  | -0.45462400 | 1.70807700  |
| H                                 | -1.19610300 | -8.73165800  | -1.96000600 | H  | -0.88034400 | -1.31644900 | 2.04587100  |
| H                                 | -3.76845100 | -11.03927400 | -0.21486800 | C  | 0.94092700  | -1.56922400 | -0.77187100 |
| H                                 | -4.09548500 | -11.77501400 | -1.78498800 | H  | 1.69443000  | -0.78149400 | -0.60429700 |
| H                                 | -1.50799000 | -11.33792800 | -1.12001400 | H  | 1.38567100  | -2.52836300 | -0.50043600 |
| H                                 | -2.03235500 | -10.84715400 | -2.73260000 | H  | 0.69563700  | -1.59293600 | -1.83561700 |
| N                                 | -3.27697600 | -8.59105500  | -1.56940500 | C  | -3.65658300 | -4.08985800 | 0.45527900  |
| H                                 | -1.09161800 | -5.54935400  | -0.91122700 | H  | -4.64277500 | -3.99165200 | -0.00752900 |
| H                                 | 1.09161800  | 5.54935400   | -0.91122700 | H  | -3.19462400 | -5.02040100 | 0.13240600  |
| <b>DMAN:HCl</b>                   |             |              |             | H  | -3.74903700 | -4.12451800 | 1.53975500  |
| Free energy = -1114.55645 a.u     |             |              |             | C  | -2.52613400 | -3.08272500 | -1.41291500 |
| Negative vibration = -497.62 cm-1 |             |              |             | H  | -2.06556500 | -4.04889200 | -1.61948200 |
| C                                 | -4.45224100 | -1.53162100  | 1.06984300  | H  | -3.47853600 | -3.00207000 | -1.94681100 |
| C                                 | -3.22923100 | -1.65030900  | 0.43563400  | H  | -1.85521700 | -2.29781700 | -1.74275900 |
| C                                 | -2.53690100 | -0.44491800  | 0.03248100  | Cl | -0.55031500 | -4.58365000 | 0.98382600  |
| C                                 | -3.29615700 | 0.77574600   | 0.02326500  | H  | -1.55754800 | -3.56118300 | 0.58081000  |

**2:HCl**

Free energy = -1845.65162 a.u

Negative frequency = -305.72 cm<sup>-1</sup>

|   |             |             |             |   |             |             |             |
|---|-------------|-------------|-------------|---|-------------|-------------|-------------|
| C | -1.12485200 | 1.55455000  | -0.97500400 | N | 5.37422400  | 1.00790800  | 0.78704100  |
| C | -0.75653700 | 0.30779000  | -0.51233000 | N | -4.78240200 | 1.16227400  | -1.48325300 |
| C | -1.78096200 | -0.64427800 | -0.16736000 | N | -5.46106700 | -0.41555800 | 0.85226100  |
| C | -3.16542000 | -0.21071900 | -0.24325800 | C | -0.12885700 | -2.62398600 | 0.32642100  |
| C | -3.47056500 | 0.98366400  | -0.99009900 | H | 0.54695000  | -2.09700600 | 1.00220700  |
| C | -2.45677100 | 1.87845500  | -1.26712300 | H | 0.35998100  | -2.65313600 | -0.64767900 |
| C | -1.50221500 | -1.99152300 | 0.26812500  | H | -0.22491800 | -3.65016400 | 0.68738400  |
| C | -4.17972800 | -0.99011500 | 0.43204000  | C | -0.18884900 | 0.83425100  | 2.31895900  |
| H | -2.66930600 | 2.80226900  | -1.78875300 | H | -0.70193100 | -0.12486500 | 2.22970100  |
| C | -3.86178900 | -2.27378100 | 0.81442500  | H | -0.79034600 | 1.56959700  | 1.78215300  |
| C | -2.55935100 | -2.77639000 | 0.66531200  | H | -0.19167100 | 1.11037000  | 3.37568400  |
| H | -4.58685600 | -2.91113400 | 1.29578100  | C | -5.18278500 | 2.51620400  | -1.84375700 |
| H | -2.37057400 | -3.80118600 | 0.96594300  | H | -4.94814700 | 3.20831500  | -1.03253400 |
| C | 0.72504600  | 0.03947800  | -0.53866600 | H | -6.26335000 | 2.52167300  | -1.99550000 |
| C | 1.65547800  | 0.34351300  | 0.51792700  | H | -4.70163400 | 2.88243900  | -2.76626500 |
| C | 1.20915800  | -0.41278800 | -1.74757100 | C | -5.12541700 | 0.20361200  | -2.54660300 |
| C | 1.24346500  | 0.77897100  | 1.83080000  | H | -6.18629500 | 0.29007100  | -2.77616000 |
| C | 3.07693800  | 0.20749000  | 0.24250800  | H | -4.92996900 | -0.81724700 | -2.21979900 |
| C | 2.55380200  | -0.75220100 | -1.93462700 | H | -4.53797900 | 0.39651000  | -3.45888300 |
| C | 2.21570700  | 1.15497500  | 2.73085000  | C | -6.29064200 | -1.33409000 | 1.66675400  |
| C | 4.02386100  | 0.81901800  | 1.15317000  | H | -6.56567900 | -2.21070900 | 1.08170900  |
| C | 3.49001500  | -0.52267400 | -0.94052900 | H | -7.20759900 | -0.80739600 | 1.92349500  |
| H | 2.83829900  | -1.25017400 | -2.85117700 | H | -5.77808600 | -1.63940900 | 2.58449000  |
| C | 3.57244300  | 1.23421800  | 2.39149300  | C | -5.27513400 | 0.84089300  | 1.62600200  |
| H | 1.91525900  | 1.46913700  | 3.72509500  | H | -6.25891300 | 1.26882200  | 1.82087100  |
| H | 4.25641800  | 1.67794300  | 3.10180600  | H | -4.69205700 | 1.55424200  | 1.05436800  |
| H | 0.50878000  | -0.59107300 | -2.55647200 | H | -4.76835200 | 0.63343800  | 2.57492300  |
| H | -0.34653500 | 2.27164400  | -1.21085500 | C | 6.33163900  | 1.28911800  | 1.84196200  |
| N | 4.80854600  | -0.98982200 | -1.08674200 | H | 6.24114500  | 2.30555700  | 2.26332300  |
|   |             |             |             | H | 7.33964800  | 1.19387200  | 1.42978500  |
|   |             |             |             | H | 6.22749300  | 0.56775400  | 2.65455600  |
|   |             |             |             | C | 5.62239900  | 1.82307200  | -0.40076800 |

|    |             |             |             |
|----|-------------|-------------|-------------|
| H  | 4.87004000  | 1.63639300  | -1.16182600 |
| H  | 6.60171000  | 1.57674900  | -0.82038300 |
| H  | 5.60858600  | 2.89850100  | -0.15644000 |
| C  | 5.24550200  | -1.41306200 | -2.40501000 |
| H  | 6.33043800  | -1.54272400 | -2.38467200 |
| H  | 5.00958800  | -0.65111700 | -3.15021800 |
| H  | 4.80237600  | -2.37010200 | -2.73069900 |
| C  | 5.33220800  | -1.85730200 | -0.03337400 |
| H  | 5.06419100  | -2.91045400 | -0.22031700 |
| H  | 4.93592400  | -1.57117800 | 0.93636000  |
| H  | 6.42209600  | -1.77885300 | 0.00557800  |
| H  | -6.53901400 | -0.03382500 | -0.08895700 |
| Cl | -7.86508800 | 0.28067700  | -0.61119900 |
